# Supplementary material for: Controlled phase and structure engineering-driven unique dielectric behavior enabling tailored electromagnetic attenuation
Source: Research Square preprint supplement (doi:10.21203/rs.3.rs-7308006/v1), 2025-10-08
Supplement: Supplementary file 1 [file 775d207e5f4d8cd0e263c9b8.pdf]

## Supplementary Information

Controlled phase and structure engineering-driven unique dielectric  
behavior enabling tailored electromagnetic attenuation

Sihao Dou<sup>1</sup>, Yunfei He<sup>1</sup>, Yuxiang Zheng<sup>1</sup>, Yuefeng Yan<sup>2</sup>, Zhiyuan Dan<sup>1</sup>, Long Ma<sup>1</sup>,  
Minghao Yang<sup>1</sup>, Dongdong Liu<sup>1</sup>, Xiaoxiao Huang<sup>2,3</sup>, Bo Zhong<sup>1,4</sup>

<sup>1</sup> School of Materials Science and Engineering, Harbin Institute of Technology, Weihai  
264209, China

<sup>2</sup> School of Materials Science and Engineering, Harbin Institute of Technology, Harbin,  
150001, China

<sup>3</sup> MIIT Key Laboratory of Advanced Structural-Functional Integration Materials &  
Green Manufacturing Technology, Harbin, 150001, China

<sup>4</sup> State Key Laboratory of Precision Welding & Joining of Materials and Structures,  
Harbin, 150001, China

Corresponding author:

Dongdong Liu, liuddhit@hit.edu.cn

Bo Zhong, zhongbo@hit.edu.cn

## Experimental Section

### Preparation of CZ, FCZ<sub>x</sub>, and FCZ4-y

#### 1) Raw materials

Zinc acetate dihydrate, cobalt nitrate hexahydrate, 2-Methylimidazole, and iron(III) acetylacetonate were purchased from Shanghai Macklin Biochemical Technology Co., Ltd, China. All the reagents were analytical grade and used without further purification. All solutions were prepared using deionized water.

#### 2) Synthesis of CZ-Z and FCZ-Z<sub>x</sub>

12 mmol of Zn(OAc)<sub>2</sub>·2H<sub>2</sub>O and 12 mmol of Co(NO<sub>3</sub>)<sub>2</sub>·6H<sub>2</sub>O were dissolved in 80 mL of deionized water and stirred for a while to obtain solution A. 100 mmol 2-methylimidazole was dissolved in 40 mL of deionized water and stirred for a while to obtain solution B. Then, solution B was poured into solution A and aged for 48 hours at room temperature. The Co/Zn-ZIF (CZ-Z) precursors were obtained by centrifugation, washed with deionized water, and then freeze-drying for 48 hours. Fe-Co/Zn-ZIF<sub>x</sub> ( $x=1, 2, 3, 4, 5$ , and  $6$ ) precursors were obtained by adding Fe(acac)<sub>3</sub> with different amounts (0.6 mmol, 1.2 mmol, 1.8 mmol, 2.4 mmol, 3.0 mmol, and 3.6 mmol, respectively) to solution A. Other preparation processes were the same. The obtained precursors were labeled as FCZ-Z1, FCZ-Z2, FCZ-Z3, FCZ-Z4, FCZ-Z5 and FCZ-Z6, respectively. For comparison, monometallic Zn-ZIF (MZ-Z, 24 mmol of zinc acetate and zero mmol of cobalt nitrate) and Fe-Zn-ZIF (FZ-Z, 2.4 mmol of Fe(acac)<sub>3</sub>) were obtained by the same process. Monometallic Co-ZIF (MC-Z, zero mmol of zinc acetate and 24 mmol of cobalt nitrate) and Fe-Co-ZIF (FC-Z, 2.4 mmol of Fe(acac)<sub>3</sub>) were also prepared using the same process.

#### 3) Synthesis of CZ and FCZ<sub>x</sub>

To obtain CZ and FCZ<sub>x</sub>, the CZ-Z and FCZ-Z<sub>x</sub> were treated by annealing at 600 °C for 3 hours at a heating rate of 2 °C min<sup>-1</sup> in nitrogen (N<sub>2</sub>), respectively. The same heat treatment process was also applied to MZ-Z or MC-Z and FZ-Z or FC-Z to synthesize Zn@NC (MZ) or Co@NC (MC) and Fe-Zn@NC (FZ) or Fe-Co@NC (FC).

#### 4) Synthesis of FCZ4-y

The FCZ4 was processed by annealing at different temperatures (500 °C, 700 °C, 800 °C, 900 °C, and 1000 °C) for three hours at a heating rate of 2 °C min<sup>-1</sup> in N<sub>2</sub> to obtain FCZ4-y (y=5, 7, 8, 9, and 10). The specific sample naming rules were shown in **Table S1**.

#### Characterization

**Structure, physical, and chemical properties:** Field emission scanning electron microscopy (SEM, Merlin Compact, Zeiss, Germany) and high-resolution transmission electron microscopy (TEM, FEI Talos F200x, America) with an energy dispersive X-ray spectroscopy (EDS, Super-X) were employed to appraise the morphologies and components of the samples. The crystal structure of the samples was determined using the powder X-ray diffraction (XRD, D8 Advanced, Bruker, Germany) technique with Cu K $\alpha$  radiation ( $\lambda = 0.15418$  nm) at a scanning voltage of 30 kV and a scanning range of 5° to 90°. X-ray photoelectron spectroscopy (XPS, Thermo Scientific K-Spin-up, Thermo Fisher, America) measurements were carried out to analyze the chemical composition and valence state of the samples. Thermogravimetry (TG, FTA4495F, Netzsch, Germany) was employed to analyze the thermal stability of materials. The specific surface areas and porosity of the powders were evaluated using N<sub>2</sub> gas adsorption-desorption isotherms at 77 K, as determined by the Brunauer-Emmett-Teller technique (Bet, ASAP2460, Mike, America). Inductively coupled plasma optical emission spectrometry (ICP-OES, Agilent 5110, America) was utilized to determine the elemental content of materials. A vibrating sample magnetometer (VSM, LakeShore 7404, America) was employed to measure magnetization ( $M$ ) versus applied magnetic field ( $H$ ) at room temperature. The conductivity ( $\sigma$ ) of the sample with 100 wt% filler loading was measured by a four-point probe powder resistivity tester. Meanwhile, the conductivity of the coaxial ring (50 wt% filler loading) was tested with an electrochemical workstation (CHI 660D, Shanghai Chenhua Instrument, China). Electronic paramagnetic resonance (EPR, EMXplus-6/1, Bruker, Germany) was employed to obtain information on vacancy defects. Photoluminescence spectroscopy

(PL, FLS1000, Edinburgh, Britain,  $\lambda = 275$  nm) was utilized to determine the defect level of the samples. Raman spectrometer (inVia, Renishaw, UK) was used to acquire information on the degree of crystallization and graphitization of carbon in composites.

### **Electromagnetic wave absorption performance test**

The powder was uniformly mixed with paraffin in a mass proportion of 50:50, respectively, and subsequently compacted into coaxial rings with an outer diameter of 7.00 mm and an inner diameter of 3.04 mm. Electromagnetic (EM) parameters were obtained by the microwave vector network analyzer (Agilent N5245A, America). Furthermore, to eliminate potential errors caused by instrumental variations or operational inconsistencies, as well as to verify the reliability and repeatability of the composites, new EM parameters were acquired in another microwave vector network analyzer (Agilent E5071C, America, provided and tested by Scientific Compass, Hangzhou Research Interest Information Technology Co., Ltd). According to the transmission line theory, the required physical quantities could be calculated through electromagnetic parameters, frequency, and thickness, as follows:

The equation of complex permittivity and complex permeability was as follows:

$$\varepsilon_r = \varepsilon' - j\varepsilon' \quad (1)$$

$$\mu_r = \mu' - j\mu' \quad (2)$$

Where  $\varepsilon_r$  was the complex permittivity,  $\varepsilon'$  was the real part of the permittivity,  $\varepsilon''$  was the imaginary part of the permittivity,  $\mu_r$  was the complex permeability,  $\mu'$  was the real part of the permeability,  $\mu''$  was the imaginary part of the permeability.

The normalized input impedance ( $Z$ ) was expressed as follows:

$$Z = \left| \frac{Z_{in}}{Z_o} \right| = \sqrt{\frac{\mu_r}{\varepsilon_r}} \tan h \left[ j \left( \frac{2\pi f d}{c} \right) \sqrt{\mu_r \varepsilon_r} \right] \quad (3)$$



$$Z_0 = \sqrt{\frac{\mu_0}{\varepsilon_0}} \quad (4)$$

Where  $Z_{in}$  was the material impedance,  $Z_0$  was the air impedance,  $\mu_0$  was the permeability of vacuum ( $4\pi \times 10^{-7} \text{ N A}^{-2}$ ),  $\varepsilon_0$  was the vacuum permittivity ( $8.85 \times 10^{-12} \text{ F m}^{-1}$ ),  $c$  was the light speed,  $f$  was the frequency, and  $d$  was the material thickness.

The reflection loss ( $RL$ ) value was calculated using the following equation:

$$RL = 20 \log \left| \frac{Z_{in} - Z_0}{Z_{in} + Z_0} \right| \quad (5)$$

The equation for calculating the attenuation constant ( $AC$ ) was as follows:

$$AC = \frac{\sqrt{2}\pi f}{c} \sqrt{\mu''\varepsilon'' - \mu'\varepsilon' + \sqrt{(\mu''\varepsilon'' - \mu'\varepsilon')^2 + (\mu'\varepsilon'' + \mu''\varepsilon')^2}} \quad (6)$$

According to the theory of Debye,  $\varepsilon'$  was related to polarization, while  $\varepsilon''$  depended on the conduction loss ( $\varepsilon_c''$ ) and polarization loss ( $\varepsilon_p''$ ) comprehensive contribution. Its equation was as follows:

$$\varepsilon' = \varepsilon_\infty + \frac{(\varepsilon_s - \varepsilon_\infty)}{1 + (2\pi f)^2 \tau^2} \quad (7)$$

$$\varepsilon'' = \varepsilon_p'' + \varepsilon_c'' = (\varepsilon_s - \varepsilon_\infty) \frac{2\pi f \tau}{1 + (2\pi f)^2 \tau^2} + \frac{\sigma}{2\pi f \varepsilon_0} \quad (8)$$

$$\varepsilon_p'' = (\varepsilon_s - \varepsilon_\infty) \frac{2\pi f \tau}{1 + (2\pi f)^2 \tau^2} \quad (9)$$

$$\varepsilon_c'' = \frac{\sigma}{2\pi f \varepsilon_0} \quad (10)$$

Where  $\sigma$  was the electrical conductivity,  $\varepsilon_s$  was the static permittivity,  $\varepsilon_\infty$  was the infinite frequency permittivity, and  $\tau$  was the relaxation time.

The modified Havriliak-Negami model was employed to fit the complex permittivity curve to acquire more information about the relaxation time in it, as shown in the following equation:

$$\varepsilon_r = \varepsilon_\infty + \frac{\varepsilon_s - \varepsilon_\infty}{[1 + (i\omega\tau)^\alpha]^\beta} - i \frac{\sigma}{\omega\varepsilon_0} \quad (11)$$

Where  $\alpha$  denoted the symmetrical broadening coefficient governing the relaxation time, and  $\beta$  represented the asymmetrical coefficient modulating the loss peak. Based on equation (11), we developed corresponding Python code to fit the relevant parameters, including static permittivity ( $\varepsilon_s$ ), optical frequency permittivity ( $\varepsilon_\infty$ ), relaxation time ( $\tau$ ), conductivity ( $\sigma$ ), and relaxation factors ( $\alpha$  and  $\beta$ ). The Python code used for this purpose is shown in **Note S5**.

To analyze the polarization relaxation process, the  $\varepsilon'$ - $\varepsilon''$  curve was used to describe the Cole-Cole semicircle. According to the theory of Debye, the  $\varepsilon'$  and  $\varepsilon''$  relationship could be expressed as follows:

$$\left(\varepsilon' - \frac{\varepsilon_s + \varepsilon_\infty}{2}\right)^2 + (\varepsilon'')^2 = \left(\frac{\varepsilon_s - \varepsilon_\infty}{2}\right)^2 \quad (12)$$

To elucidate the mechanism governing the low-frequency shift of absorption peaks with increasing thickness and high-frequency shift with enhanced material filling ratio, a quarter wavelength model was employed to characterize the correlation between the peak absorption frequency ( $f_m$ ) and the optimized thickness ( $t_m$ ), as shown in the equation below:

$$t_m = \frac{n\lambda}{4} = \frac{nc}{4f_m\sqrt{|\mu_r||\varepsilon_r|}} \quad (n = 1, 3, 5, \dots) \quad (13)$$

### Electromagnetic shielding performance test

The powder was uniformly mixed with paraffin in a mass proportion of 50:50, respectively, and subsequently compacted into coaxial rings with an outer diameter of 7.00 mm and an inner diameter of 3.04 mm. The S-parameters ( $S_{11}$ ,  $S_{22}$ ,  $S_{12}$ , and  $S_{21}$ ) were obtained by the microwave vector network analyzer (Agilent N5245A, America). By applying the transmission line theory, these parameters could be converted into EMI shielding coefficients, namely, transmittance ( $T$ ), reflectance ( $R$ ), and absorbance ( $A$ ).

The specific equations were as follows:

$$R = |S_{11}|^2 = |S_{22}|^2 \quad (14)$$

$$T = |S_{12}|^2 = |S_{21}|^2 \quad (15)$$

$$1 = A + R + T \quad (16)$$

Another parameter frequently used to evaluate shielding performance was the SE, referred to as total EMI shielding effectiveness ( $SE_T$ ). Also, shielding effectiveness by reflection ( $SE_R$ ) and absorption ( $SE_A$ ) could be obtained from S-parameters. The equations were shown below:

$$SE_T = 10 \log\left(\frac{1}{T}\right) = 10 \log\left(\frac{1}{|S_{12}|^2}\right) \quad (17)$$

$$SE_R = 10 \log\left(\frac{1}{1-R}\right) = 10 \log\left(\frac{1}{1-|S_{11}|^2}\right) \quad (18)$$

$$SE_A = 10 \log\left(\frac{1-R}{T}\right) = 10 \log\left(\frac{1-|S_{11}|^2}{|S_{12}|^2}\right) \quad (19)$$

## Simulation

### Plane RCS simulation with CST Studio Suite 2022

A square model measuring  $180 \times 180 \text{ mm}^2$  was constructed with an absorbing layer of 2.03 mm and a perfect electric conductor (PEC) layer of 1.0 mm. The excitation source was a plane wave, and the spherical coordinate angles  $\theta$  and  $\phi$  determined the direction of the scattered EMW. The specific model diagram was shown in Fig. S56. A monitoring frequency of 17.92 GHz was selected. The value of RCS was calculated using the following equation:

$$\sigma \text{ (dB m}^2\text{)} = 10 \log \left[ \frac{4\pi S}{\lambda^2} \left| \frac{E_s}{E_i} \right|^2 \right] \quad (20)$$

Where  $S$  represented the area of the simulated plate,  $\lambda$  denoted the wavelength of the incident electromagnetic wave,  $E_s$  stood for the emitted electric field strength, and  $E_i$  was the received electric field strength. The low scattered signal strength in the final simulation corresponded to high EMW absorption properties.

### **Electromagnetic power loss density simulation with COMSOL**

The electromagnetic power loss density was calculated using COMSOL Multiphysics version 6.2. The frequency selected for the computational simulation was 17.92 GHz. The corresponding model and dimensions referred to the morphology and dimensions in the SEM and TEM images.

### **Density functional theory (DFT) calculation:**

DFT calculations were performed using the Cambridge Serial Total Energy Package (CASTEP) in the Materials Studio software. The exchange-correlation energies were dealt with using generalized gradient approximation-Perdew-Bruke-Ernzerhof (GGA-PBE) with ultrasoft pseudopotentials. The kinetic cutoff energy of 900 eV was chosen for plane-wave expansion. K-point in the Brillouin zone was sampled with a value of  $8 \times 8 \times 8$ . The electronic iterative convergence criterion for structure optimization and energy calculations was  $1 \times 10^{-6}$  eV atom<sup>-1</sup> for self-consistent fields (SCF). All the structures were relaxed until the residual forces on the atoms declined to less than 0.03 eV Å<sup>-1</sup>. The collinear mode under spin polarization was turned on for magnetic systems.

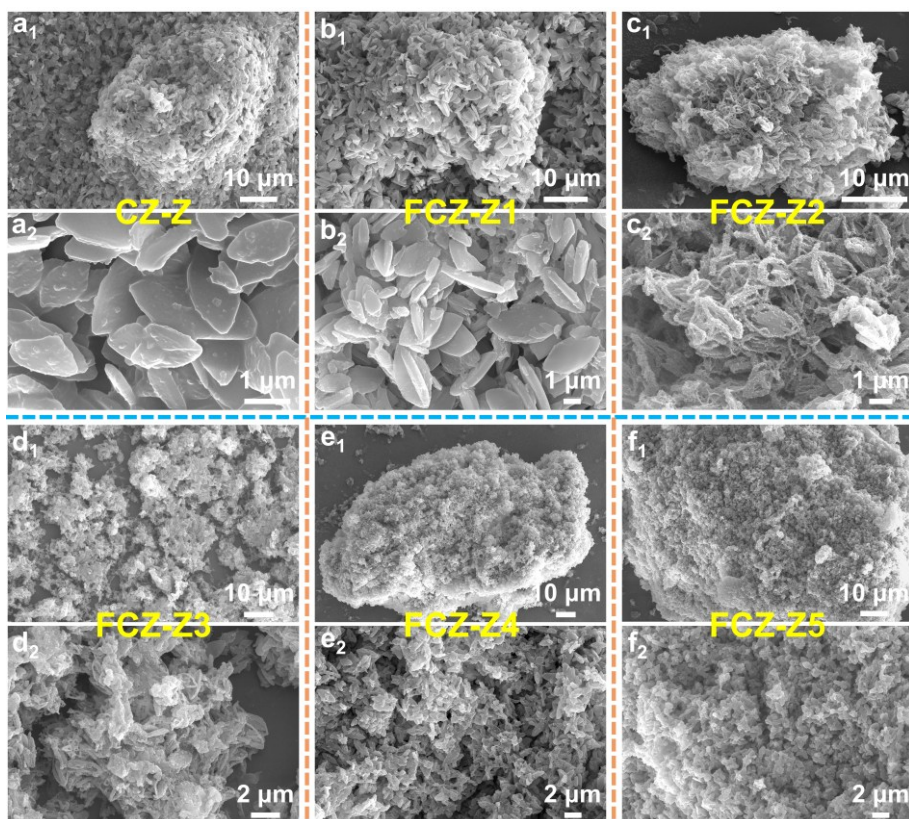

**Fig. S1** SEM images of a) CZ-Z, b) FCZ-Z1, c) FCZ-Z2, d) FCZ-Z3, e) FCZ-Z4, and f) FCZ-Z5.

i) The CZ-Z precursor exhibited a leaf-like architecture with a specific thickness. This unique structure might arise from the anisotropic crystal growth governed by asymmetric ligand coordination. ii) The FCZ-Z1 precursor demonstrated a well-defined leaf-like morphology, with initial self-assembly and structural interpenetration features observed. This phenomenon could be principally attributed to the establishment of structurally reinforced Fe-Co-Zn ternary coordination nodes coupled with the augmented metal-ligand bonding strength derived from the elevated charge density characteristic of  $\text{Fe}^{3+}$ . iii) The FCZ-Z2 precursor framework exhibited a leaf-like structure with pronounced micrometer-scale pores owing to edge corrosion and dissolution. Meanwhile, it demonstrated an enhanced tendency for interlamellar assembly with mutually interpenetrating configurations. iv) Continuous agitation progressively diminished the morphological distinguishability in the precursor with increasing  $\text{Fe}^{3+}$  content. Nevertheless, pyrolytic treatment maintained the precursor's

structural integrity while achieving enhanced outline definition.

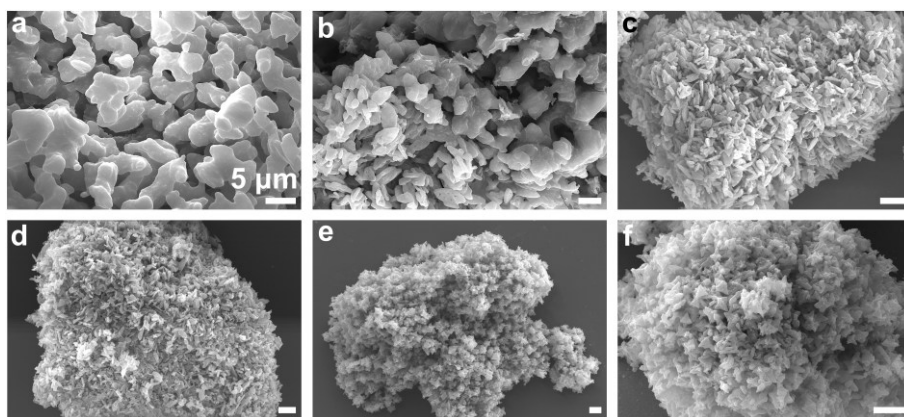

**Fig. S2** SEM images of a) CZ, b) FCZ1, c) FCZ2, d) FCZ3, e) FCZ4, and f) FCZ5 (all images were on a five  $\mu\text{m}$  scale bar).

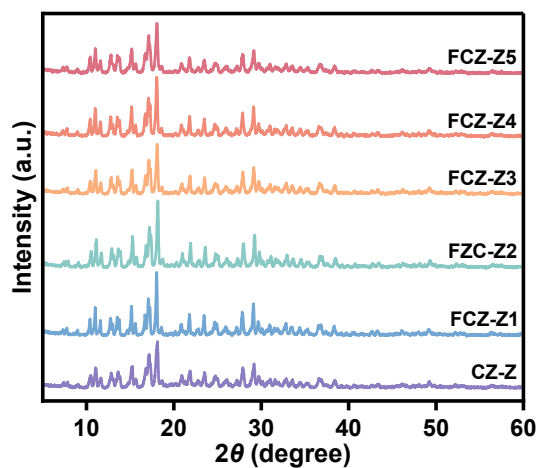

**Fig. S3** XRD patterns of CZ-Z and FCZ-Z<sub>x</sub> precursors.

The X-ray diffraction (XRD) analysis revealed that introducing  $\text{Fe}^{3+}$  into the precursor system did not induce any detectable phase transformations, as evidenced by the absence of emergent diffraction peak features and the preservation of original peak intensity profiles.



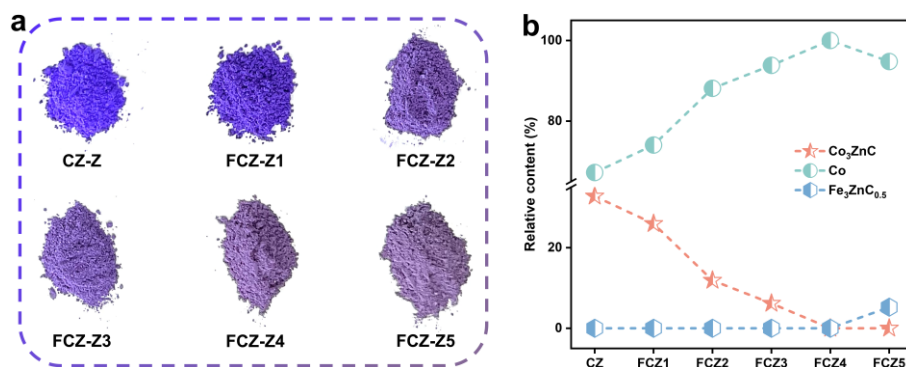

**Fig. S4** a) Digital photos of CZ-Z, FCZ-Z1, FCZ-Z2, FCZ-Z3, FCZ-Z4, and FCZ-Z5 precursors (each sample was approximately 1 cm wide). b) The relative content of different components obtained from XRD.

As the  $\text{Fe}^{3+}$  content increased, the precursor gradually became lighter from its original purple color, indicating that  $\text{Fe}^{3+}$  had been successfully incorporated into the bimetallic MOF system.

Semi-quantitative XRD analysis indicated that the concentration of  $\text{Co}_3\text{ZnC}$  progressively decreased with the introduction of  $\text{Fe}^{3+}$ , confirming the inhibitory effect of  $\text{Fe}^{3+}$  on the nucleation of  $\text{Co}_3\text{ZnC}$ .

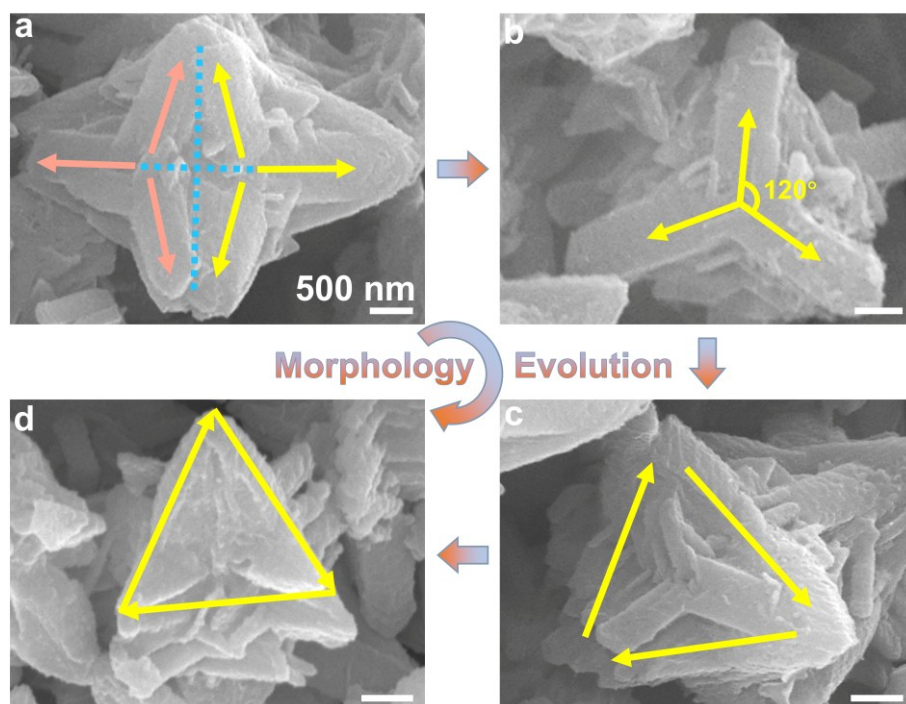

**Fig. S5** SEM images of FCZ4 (all images were on a 500 nm scale bar).

The leaf-like structures exhibited mutual cropping and splitting behaviors as the self-assembly approached saturation. Thus, various configurations were observed in FCZ4. This was the process of progressive development and evolution of the architecture, which also served as the foundational framework for understanding the emergence of the stacked star-like structure that formed in FCZ5, as detailed in the following description: a) The leaf-like structures were cropped from one another, resulting in the leaves being split along both axes (blue dashed line) of their surface. b) A leaf was divided into four symmetrical rectangular-like structures, where two rectangles were separated along the direction of the long axis of the surface, and one rectangle from another disconnected leaf was assembled to form a triangular boomerang-like structure, arranged at angles of  $120^\circ$  to each other. c) The material extended outward into a triangular-like architecture as it progressively grew and blended into one another. Nevertheless, the triangular boomerang-like structure was still visible at this point. d) The material essentially formed a triangle-shaped morphology, providing the basis for star-like structures in FCZ5.

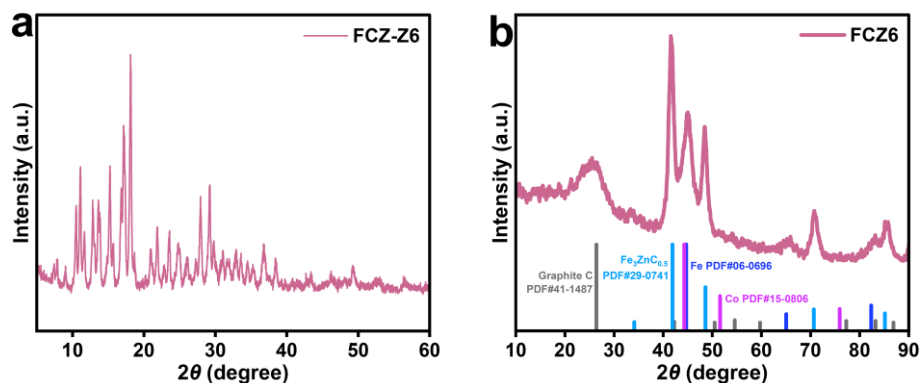

**Fig. S6** XRD patterns of a) FCZ-Z6 and b) FCZ6.

The crystal structure of the FCZ-Z6 precursor showed no notable alterations. New diffraction peaks at  $33.4^\circ$ ,  $70.2^\circ$ , and  $84.6^\circ$  in FCZ6, assigned to the (110), (220), and (311) crystal planes of  $\text{Fe}_3\text{ZnC}_{0.5}$ , respectively, confirmed the absence of the  $\text{Co}_3\text{ZnC}$  phase and the existence of the  $\text{Fe}_3\text{ZnC}_{0.5}$  phase. The intensity of the diffraction peaks at  $41.7^\circ$  and  $48.4^\circ$ , belonging to the (111) and (200) crystal planes of  $\text{Fe}_3\text{ZnC}_{0.5}$ , respectively, was strengthened compared to that of FCZ5. The intensity of the diffraction peaks at  $65.4^\circ$  and  $82.8^\circ$ , corresponding to the (200) and (211) crystal planes of Fe, respectively, was also enhanced compared to that of FCZ5.

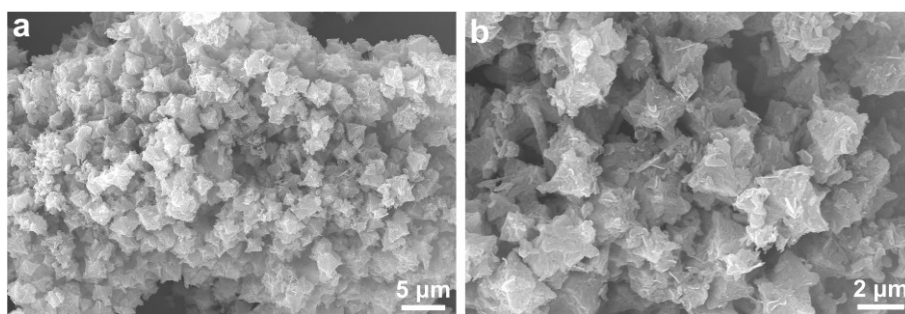

**Fig. S7** SEM images of FCZ6.

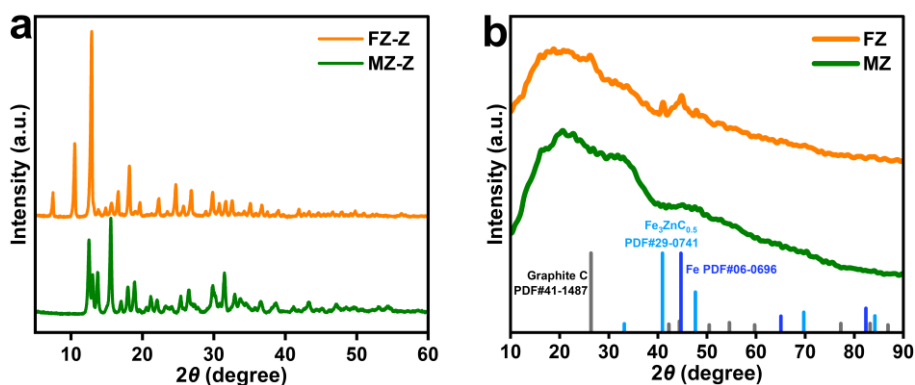

**Fig. S8** XRD patterns of a) MZ-Z and FZ-Z, and b) MZ and FZ.

In comparison to the MZ-Z precursor, several new diffraction peaks appeared in the FZ-Z precursor, indicating the successful introduction of  $\text{Fe}^{3+}$  and the alteration of the crystal structure and chemical composition of the precursor. Besides, observing that the mixed solution rapidly changed from its original white color to an orange-yellow hue upon adding  $\text{Fe}(\text{acac})_3$  suggested a violent chemical reaction. Following pyrolysis, only broad peaks located around  $23.0^\circ$  and  $44.4^\circ$ , corresponding to the (002) and (101) crystal planes of graphitic carbon, respectively, were detected in MZ. The absence of diffraction peaks for Zn species may be due to its dispersion in the carbon matrix in amorphous phases, which conventional XRD techniques cannot detect. The new diffraction peaks in FZ could be ascribed to the metallic Fe and  $\text{Fe}_3\text{ZnC}_{0.5}$  phases. Specifically, the diffraction peak situated at  $44.8^\circ$  belonged to the (110) crystal plane of metallic Fe, while the peaks located at  $41.1^\circ$  and  $47.9^\circ$  were associated with the (111) and (200) crystal planes of  $\text{Fe}_3\text{ZnC}_{0.5}$ , respectively.

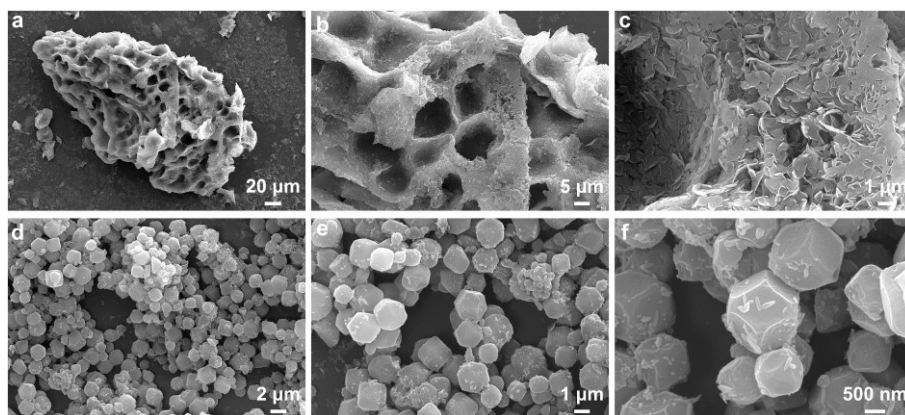

**Fig. S9** SEM images of a-c) MZ-Z and d-f) FZ-Z.

The MZ-Z precursor exhibited a block structure with porous features, while  $\text{Fe}^{3+}$  incorporation shifted the topology of ZIF to a dodecahedral-like configuration.

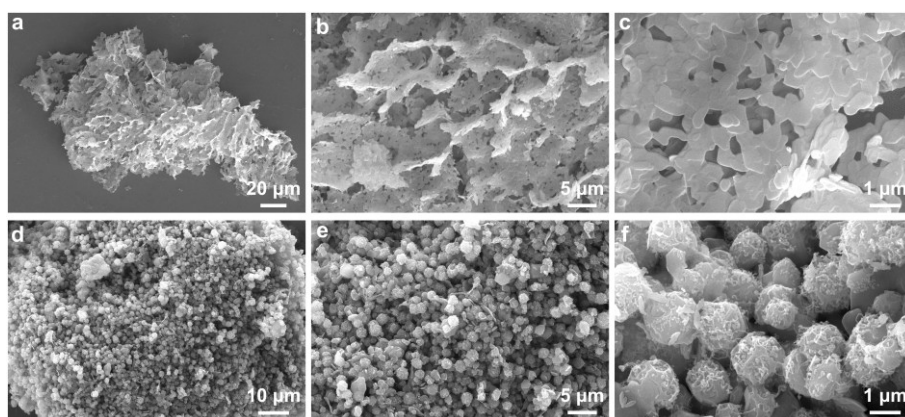

**Fig. S10** SEM images of a-c) MZ and d-f) FZ.

In contrast to the MZ-Z precursor, the structure of MZ collapsed into a porous nanosheet architecture, whereas the  $\text{Fe}^{3+}$ -introduced FZ essentially retained the framework of the precursor, demonstrating a spherical-like polyhedral structure.

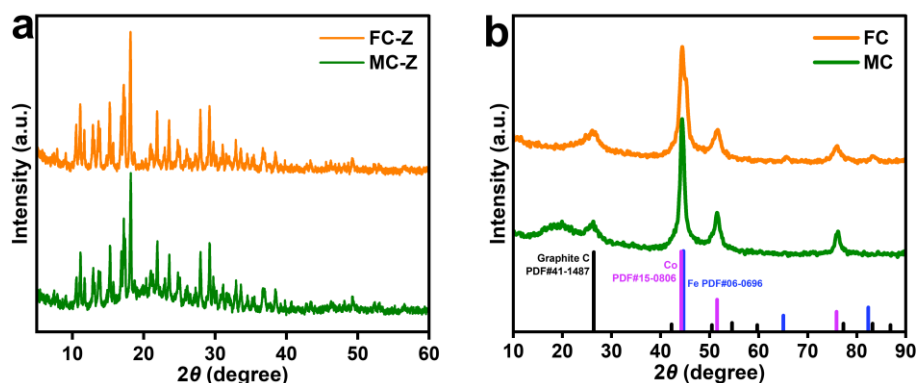

**Fig. S11** XRD patterns of a) MC-Z and FC-Z, and b) MC and FC.

Compared to MC-Z, no new diffraction peaks appeared in FC-Z, implying that the introduction of  $\text{Fe}^{3+}$  hardly modified the crystal structure of the precursor. The color of the mixed solution changed from its original purple to lavender upon the addition of  $\text{Fe}^{3+}$ , and the reaction was significantly less intense than that of FZ-Z. Following pyrolysis, the metallic Co phase was visible in MC in addition to the graphitic carbon phase. The diffraction peaks were located at  $44.3^\circ$ ,  $51.5^\circ$ , and  $76.1^\circ$ , corresponding to the (111), (200), and (220) crystal planes of metallic Co, respectively. In FC, not only were the new diffraction peaks of the reduced metallic Fe phase observed, but a significant reduction in the intensity of the diffraction peaks associated with metallic Co was also found. The (110), (200), and (211) crystal planes of metallic Fe were responsible for the diffraction peaks at  $44.9^\circ$ ,  $65.5^\circ$ , and  $83.0^\circ$ , respectively.



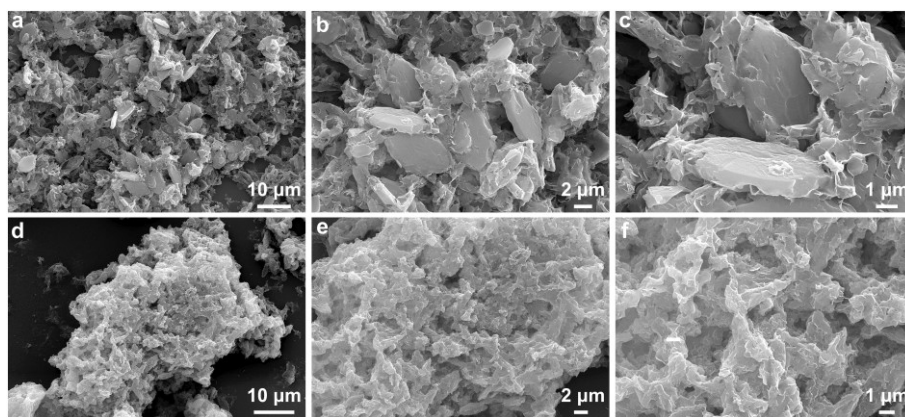

**Fig. S12** SEM images of a-c) MC-Z and d-f) FC-Z.

The MC-Z precursor exhibited a leaf-like structure similar to that of CZ-Z, but with a rough surface. However, the structure transformed into a poorly outlined, stacked blocky structure after the introduction of  $\text{Fe}^{3+}$ .

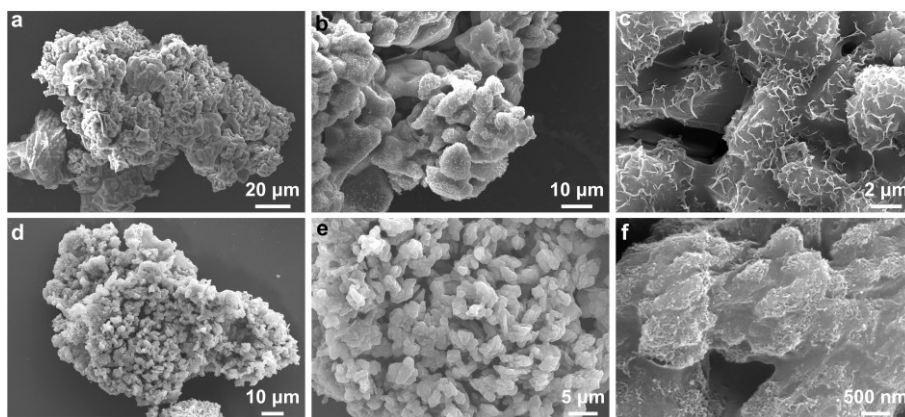

**Fig. S13** SEM images of a-c) MC and d-f) FC.

The structure of MC also collapsed into stacked clusters, whereas the  $\text{Fe}^{3+}$ -introduced FC perfectly preserved the precursor structure, displaying an elongated block morphology.

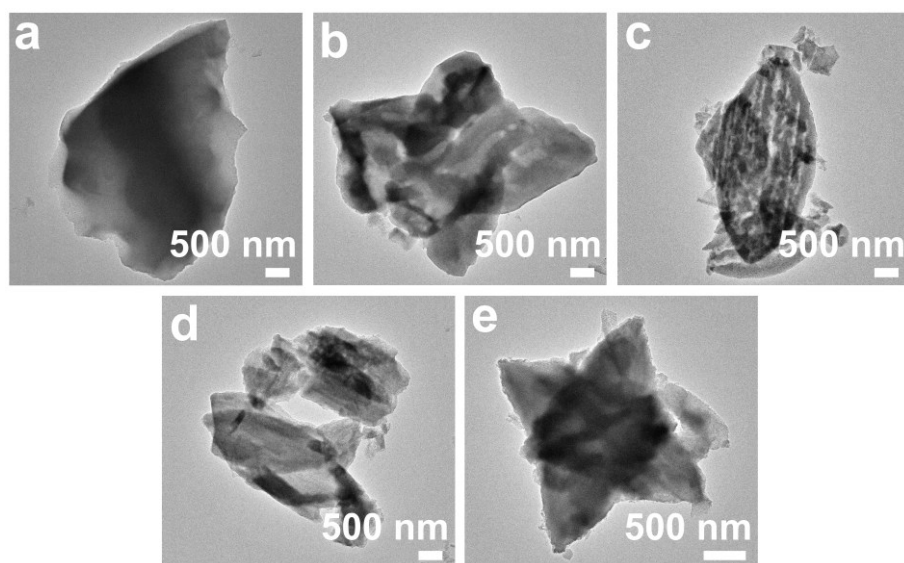

**Fig. S14** TEM images of a) CZ, b) FCZ1, c) FCZ2, d) FCZ3, and e) FCZ5.

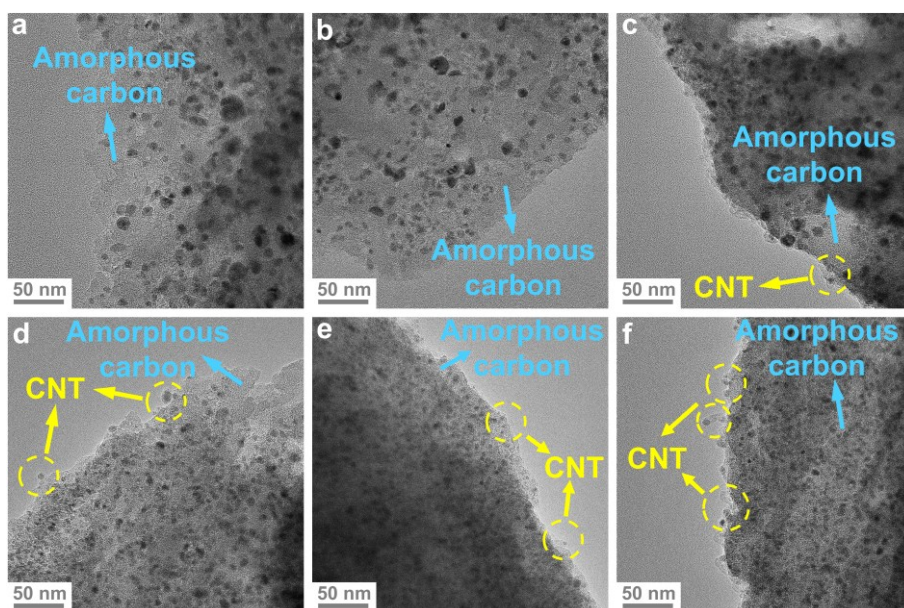

**Fig. S15** TEM images of a) CZ, b) FCZ1, c) FCZ2, d) FCZ3, e) FCZ4, and f) FCZ5.

Metal NPs of various sizes, anchored to the amorphous carbon matrix, were observed in all samples. With the increase in  $\text{Fe}^{3+}$  concentration, the presence of carbon nanotubes (CNTs) was distinctly found at the edge of the carbon substrate, verifying the role of Fe-catalyzed carbon-directed growth at high temperatures.



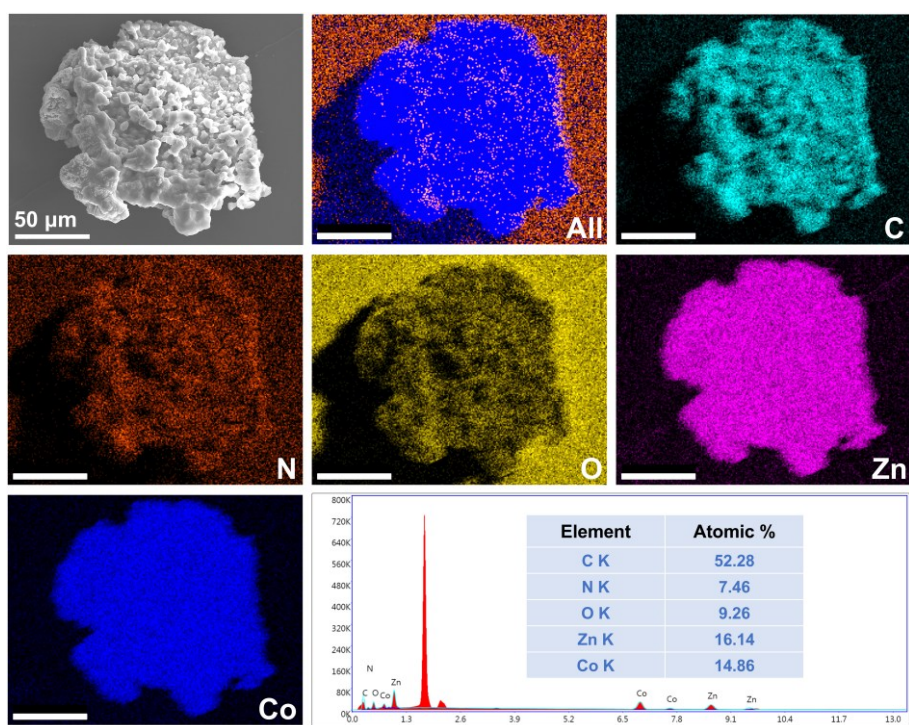

**Fig. S17** SEM-EDS elemental mapping of CZ (all images were on a 50 μm scale bar).



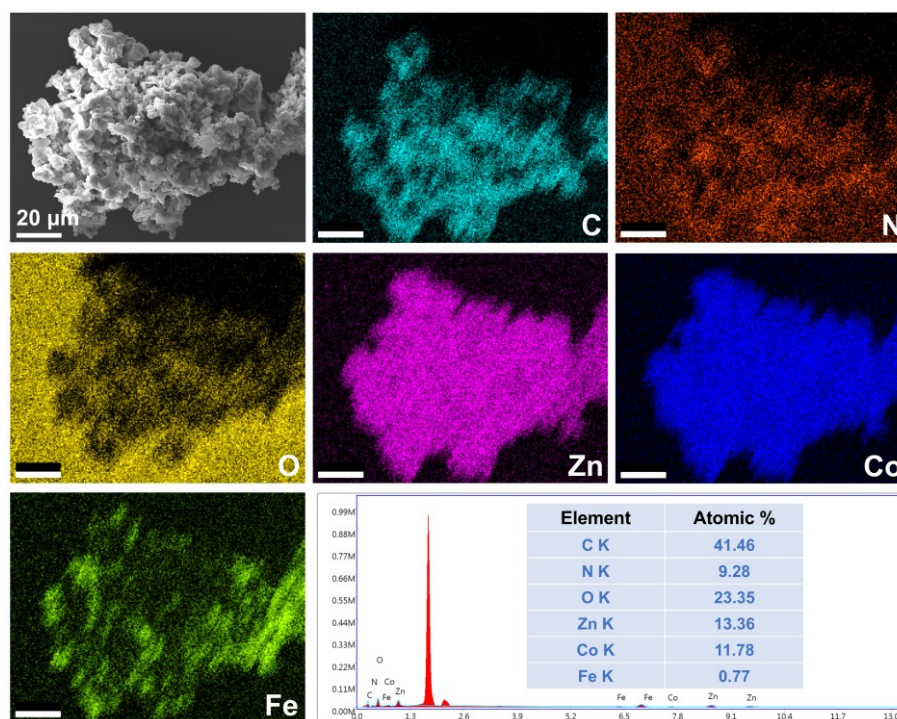

**Fig. S18** SEM-EDS elemental mapping of FCZ1 (all images were on a 20  $\mu\text{m}$  scale bar).

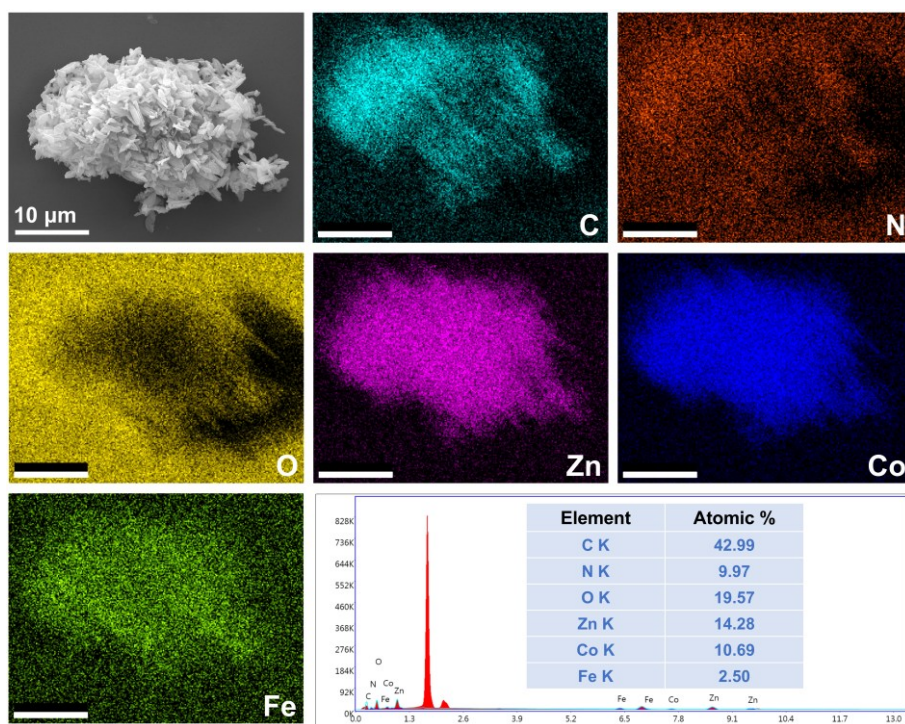

**Fig. S19** SEM-EDS elemental mapping of FCZ2 (all images were on a 10 µm scale bar).



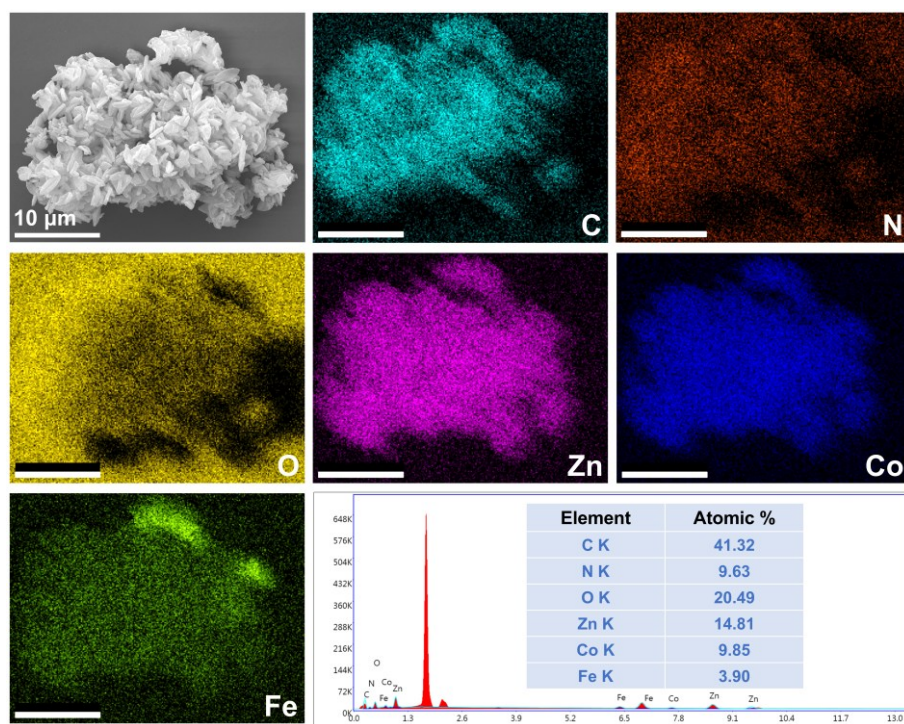

**Fig. S20** SEM-EDS elemental mapping of FCZ3 (all images were on a 10 µm scale bar).

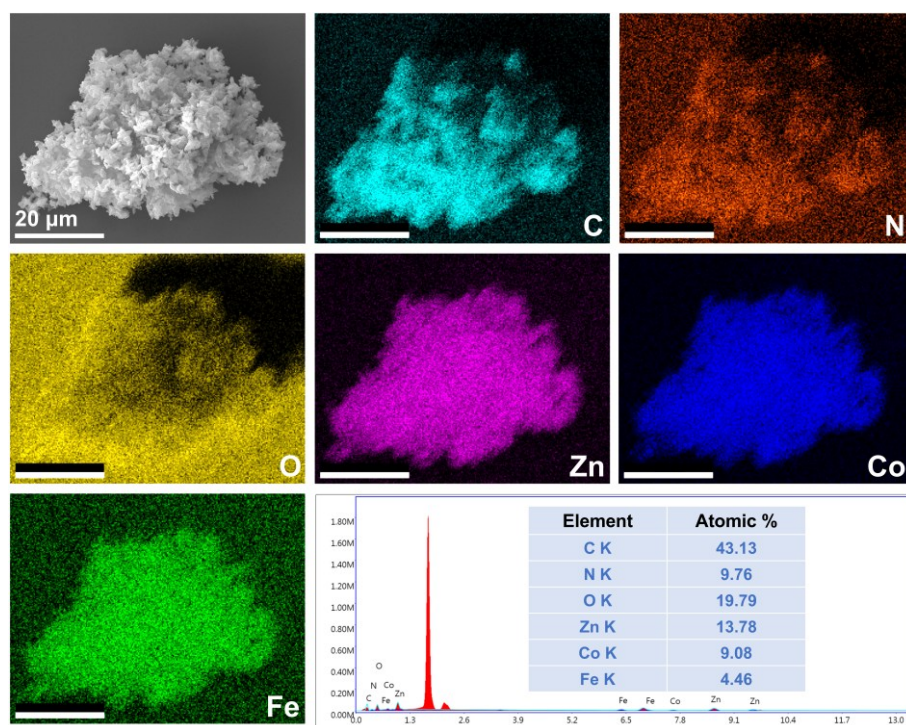

**Fig. S21** SEM-EDS elemental mapping of FCZ4 (all images were on a 20 μm scale bar).

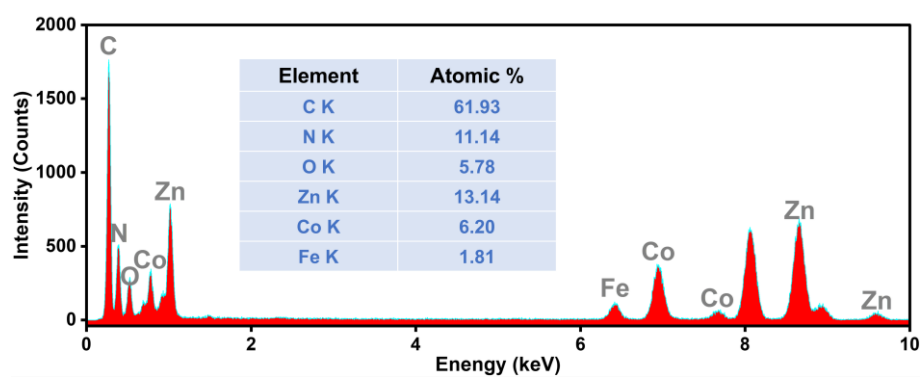

**Fig. S22** TEM-EDS elemental mapping result of FCZ4.

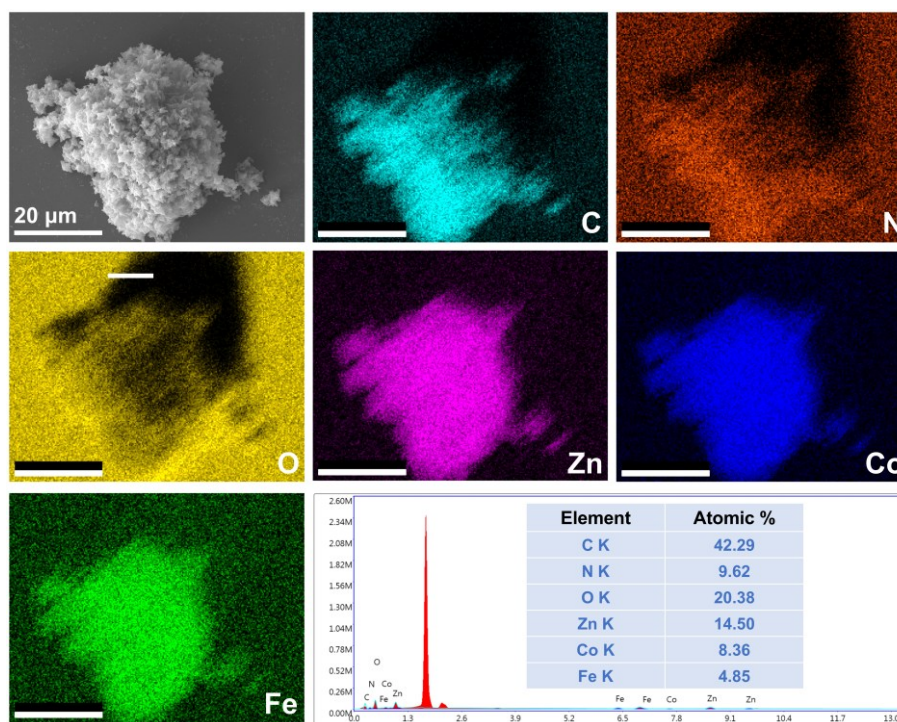

**Fig. S23** SEM-EDS elemental mapping of FCZ5 (all images were on a 20 μm scale bar).

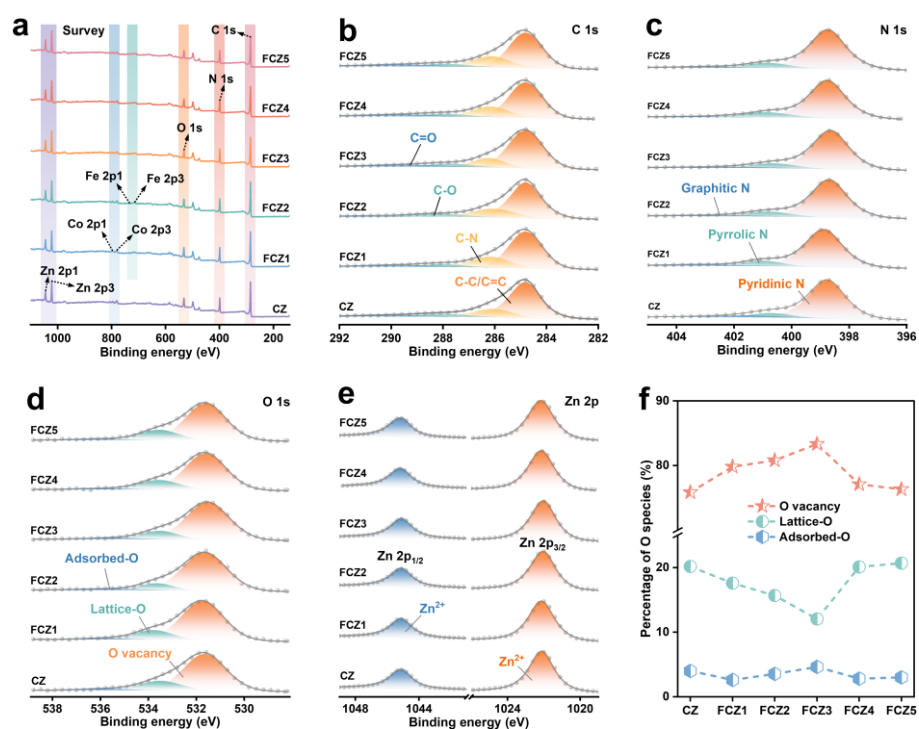

**Fig. S24** a) XPS survey spectra, b) C 1s spectrum, c) N 1s spectrum, d) O 1s spectrum, and e) Zn 2p spectrum of CZ and FCZx. f) Percentage of oxygen species.

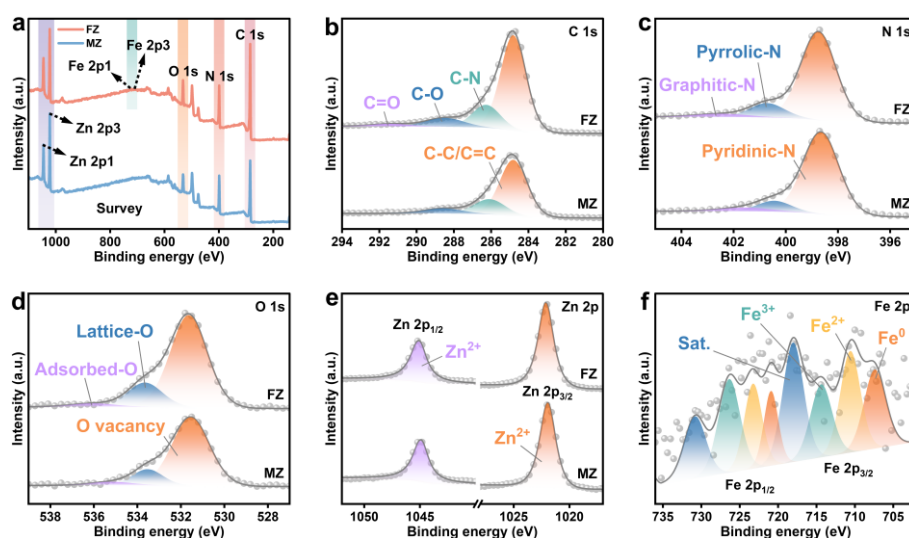

**Fig. S25** a) XPS survey spectra, b) C 1s spectrum, c) N 1s spectrum, d) O 1s spectrum, and e) Zn 2p spectrum of MZ and FZ. f) Fe 2p spectrum of FZ.

The elemental distribution of C 1s, N 1s, and O 1s species in MZ exhibited compositional characteristics nearly identical to those observed in the bimetallic system. Notably, distinct characteristic peaks corresponding to Zn 2p<sub>1/2</sub> and Zn 2p<sub>3/2</sub> were identified in both MZ and FZ materials through XPS analysis. This observation, combined with the absence of Zn-related crystalline diffraction patterns in XRD characterization, strongly indicated the existence of Zn in the form of an amorphous ZnO phase dispersed within the carbon matrix. Observing Fe<sup>0</sup> species in the high-resolution Fe 2p spectrum of FZ supported the generation of metallic Fe and Fe<sub>3</sub>ZnC<sub>0.5</sub> phases. High valence states of Fe<sup>2+</sup> and Fe<sup>3+</sup> were detected, potentially resulting from oxidation of the material surface.



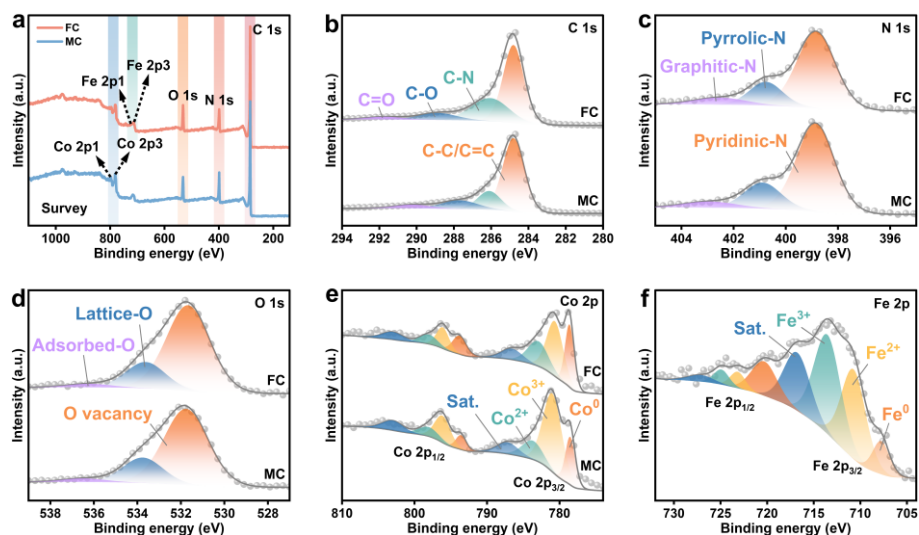

**Fig. S26** a) XPS survey spectra, b) C 1s spectrum, c) N 1s spectrum, d) O 1s spectrum, and e) Co 2p spectrum of MC and FC. f) Fe 2p spectrum of FC.

The species detected in the high-resolution C 1s, N 1s, and O 1s spectra in MC were almost identical to those in the bimetallic system. The generation of metallic Co and metallic Fe was further corroborated by the detection of  $\text{Co}^0$  and  $\text{Fe}^0$  species in the high-resolution Co 2p and Fe 2p spectra, which agreed with the results of XRD. The observed high valence states of Co ( $\text{Co}^{2+}/\text{Co}^{3+}$ ) and Fe ( $\text{Fe}^{2+}/\text{Fe}^{3+}$ ) may be caused by the partial oxidation of the surface of the material exposed to air.

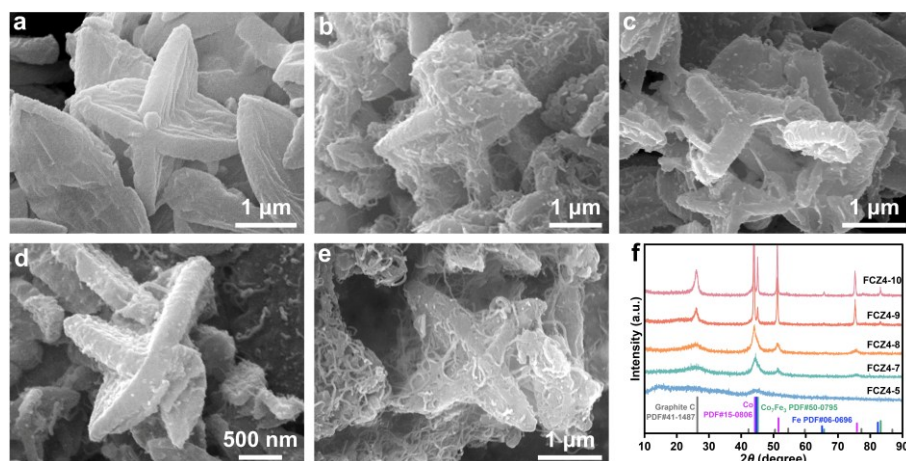

**Fig. S27** SEM images of a) FCZ4-5, b) FCZ4-7, c) FCZ4-8, d) FCZ4-9, and e) FCZ4-10. f) XRD patterns of FCZ4-y.



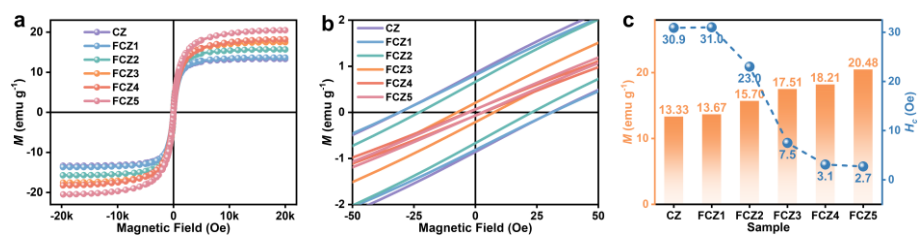

**Fig. S28** Magnetization ( $M$ - $H$ ) curves measured at room temperature.

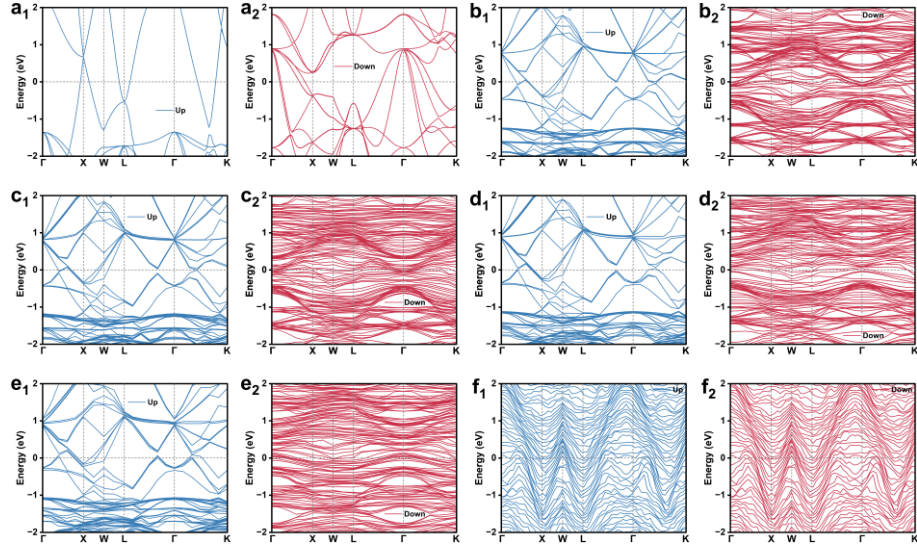

**Fig. S29** The band structure after geometric optimization. Spin-up and spin-down of the band structure of a) Co ( $Fm-3m$ ), b)  $Fe_2Co_{30}$ , c)  $Fe_4Co_{28}$ , d)  $Fe_8Co_{24}$ , e)  $Fe_{12}Co_{20}$ , and f)  $Fe_{16}Co_{16}$ .

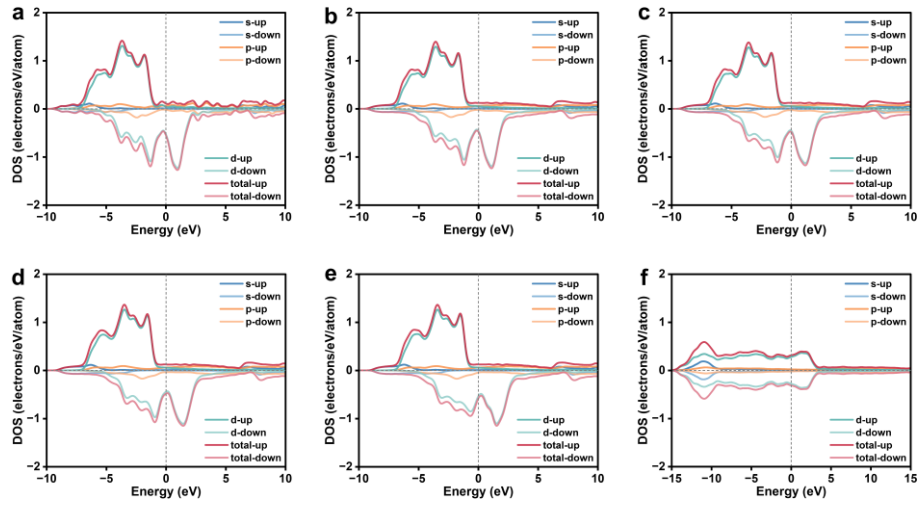

**Fig. S30** The PDOS of a) Co, b)  $\text{Fe}_2\text{Co}_{30}$ , c)  $\text{Fe}_4\text{Co}_{28}$ , d)  $\text{Fe}_8\text{Co}_{24}$ , e)  $\text{Fe}_{12}\text{Co}_{20}$ , and f)  $\text{Fe}_{16}\text{Co}_{16}$ .

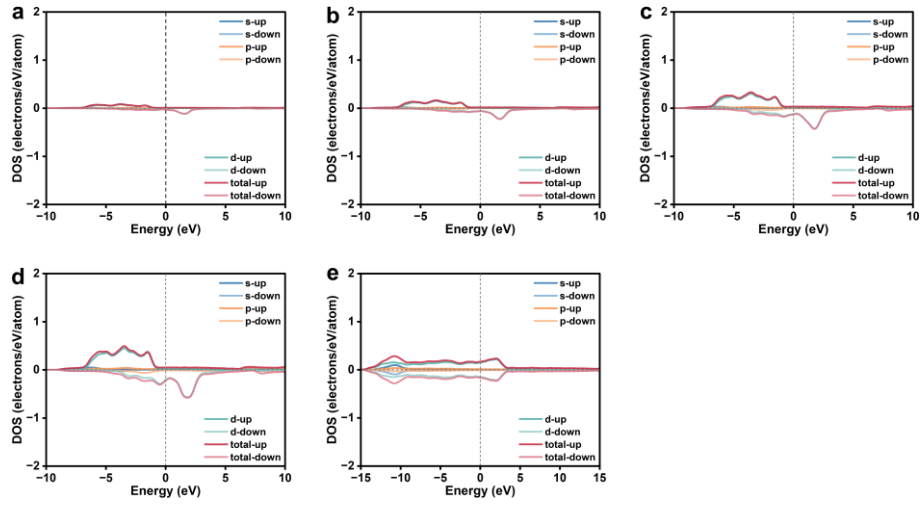

**Fig. S31** The Fe-PDOS of a)  $\text{Fe}_2\text{Co}_{30}$ , b)  $\text{Fe}_4\text{Co}_{28}$ , c)  $\text{Fe}_8\text{Co}_{24}$ , d)  $\text{Fe}_{12}\text{Co}_{20}$ , and e)  $\text{Fe}_{16}\text{Co}_{16}$ .

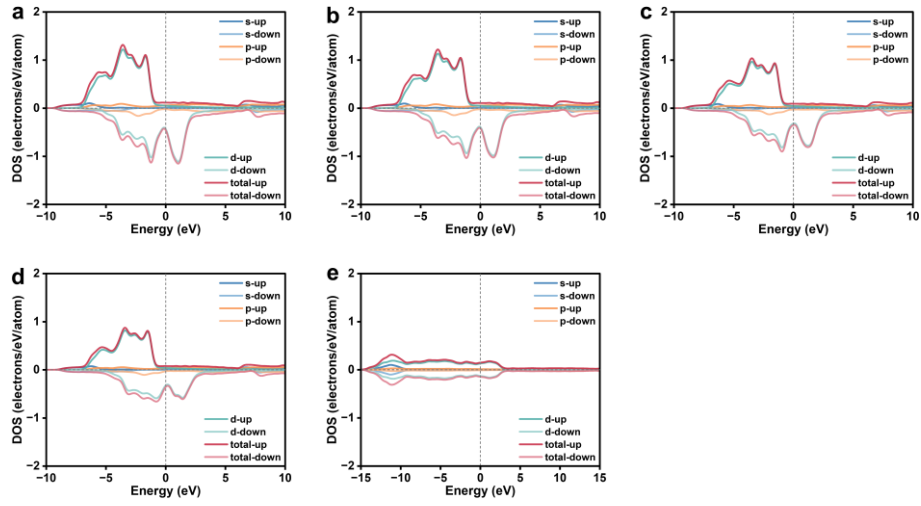

**Fig. S32** The Co-PDOS of a)  $\text{Fe}_2\text{Co}_{30}$ , b)  $\text{Fe}_4\text{Co}_{28}$ , c)  $\text{Fe}_8\text{Co}_{24}$ , d)  $\text{Fe}_{12}\text{Co}_{20}$ , and e)  $\text{Fe}_{16}\text{Co}_{16}$ .

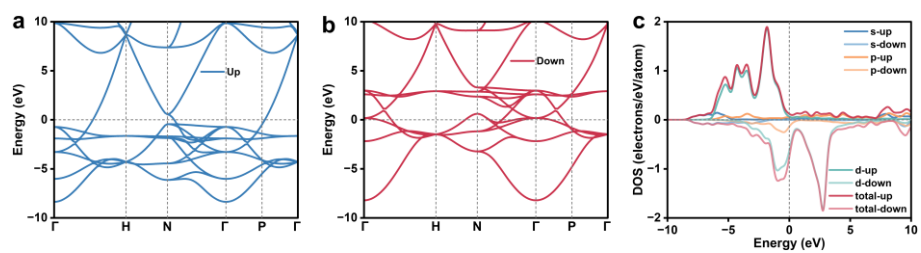

**Fig. S33** The band structure and PDOS of Fe ( $Im\bar{3}m$ ) after geometric optimization. a) Spin-up and b) spin-down of the band structure. c) PDOS.

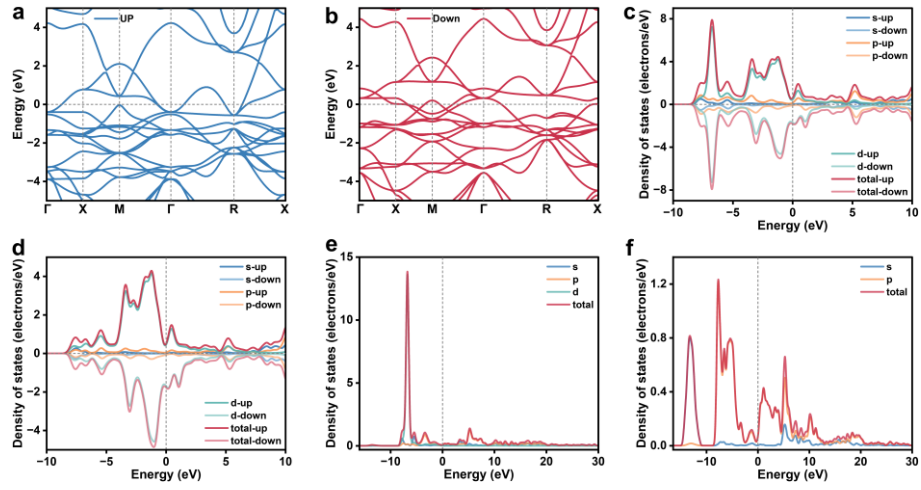

**Fig. S34** The band structure and PDOS of  $\text{Co}_3\text{ZnC}$  after geometric optimization. a) Spin-up and b) spin-down of the band structure. c) All, d) Co, e) Zn, and f) C of PDOS.

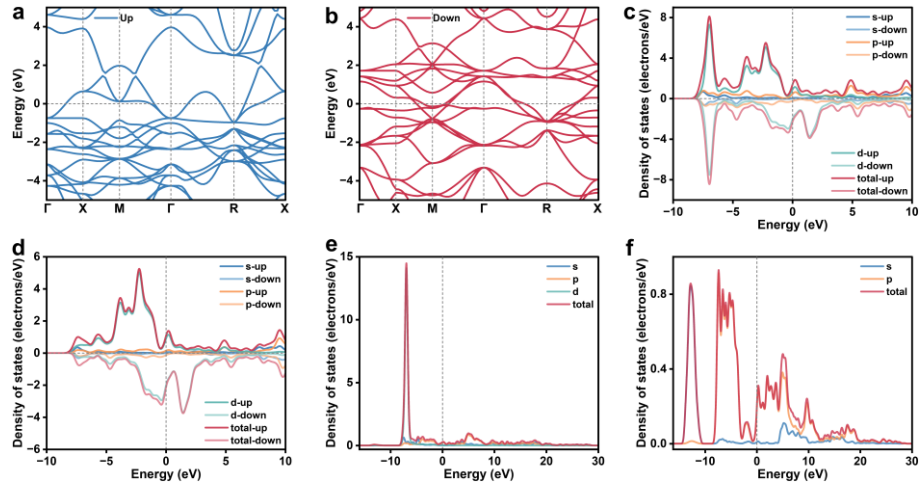

**Fig. S35** The band structure and PDOS of  $\text{Fe}_3\text{ZnC}_{0.5}$  after geometric optimization. a) Spin-up and b) spin-down of the band structure. c) All, d) Fe, e) Zn, and f) C of PDOS.



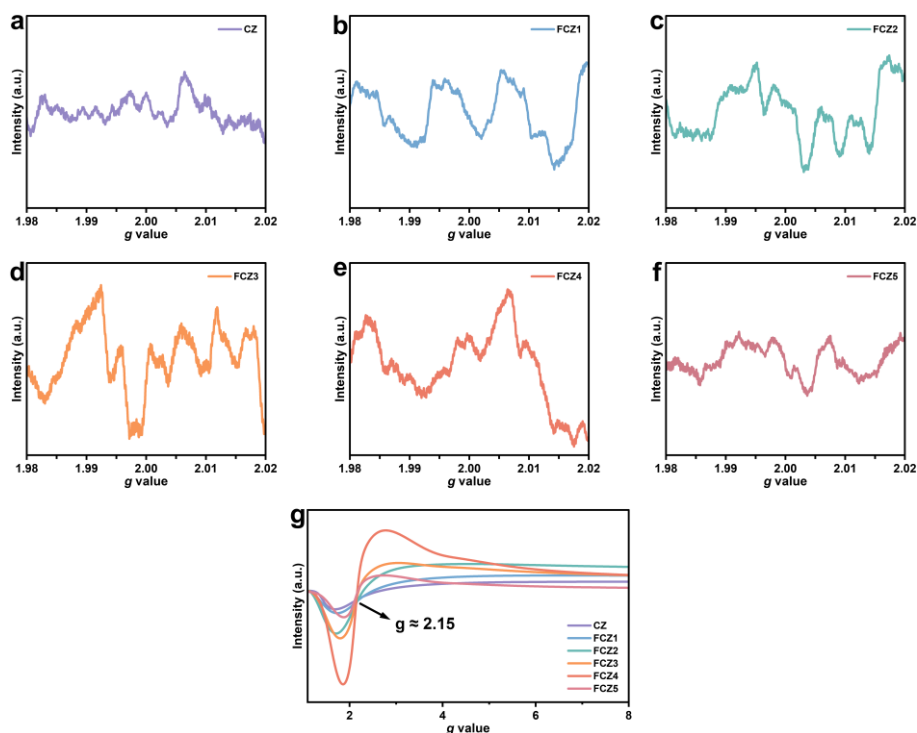

**Fig. S36** EPR narrow spectrum signal of a) CZ, b) FCZ1, c) FCZ2, d) FCZ3, e) FCZ4, and f) FCZ5. g) EPR full-spectrum signal.

While the noisy peaks within narrow spectral ranges lacked sufficient resolution to identify the characteristics of unpaired electrons, systematic variations in integrated peak intensities demonstrated strong correlations with the evolving concentrations of paramagnetic centers and unpaired electron populations. The broad EPR signals centered at  $g \approx 2.15$  suggested the presence of paramagnetic centers, likely attributed to high-spin  $\text{Fe}^{3+}$  species or unpaired electrons in Fe-Co solid solutions. The intensity variation of signal peaks observed in the full spectrum exhibited identical behavior to that detected in the narrow spectrum, demonstrating that the  $\text{Fe}^{3+}$  species or Fe-Co solid solutions initially increased proportionally with Fe incorporation concentration. This enhancement peaked at 2.4 mmol Fe loading and subsequently displayed a declining trend.

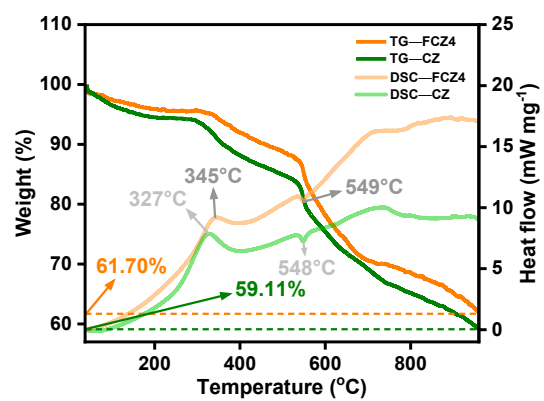

**Fig. S37** The TG and DSC curves of CZ and FCZ4.

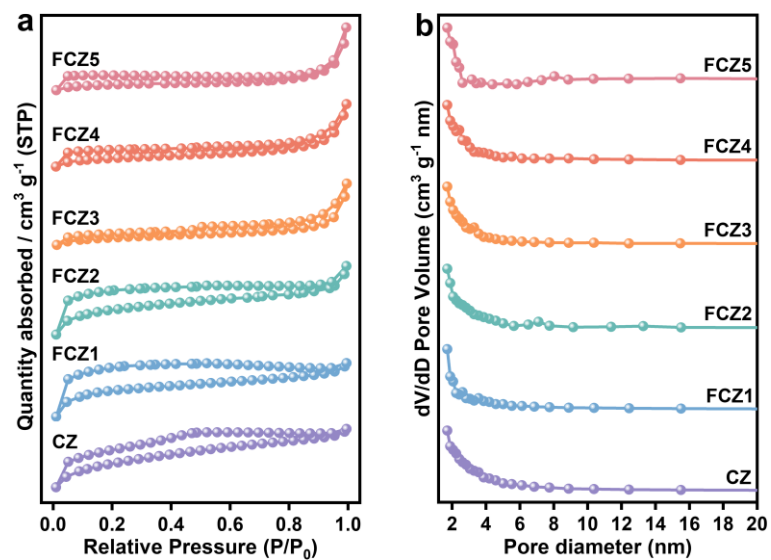

**Fig. S38** a)  $\text{N}_2$  adsorption-desorption isotherms. b) The pore size distribution curves.

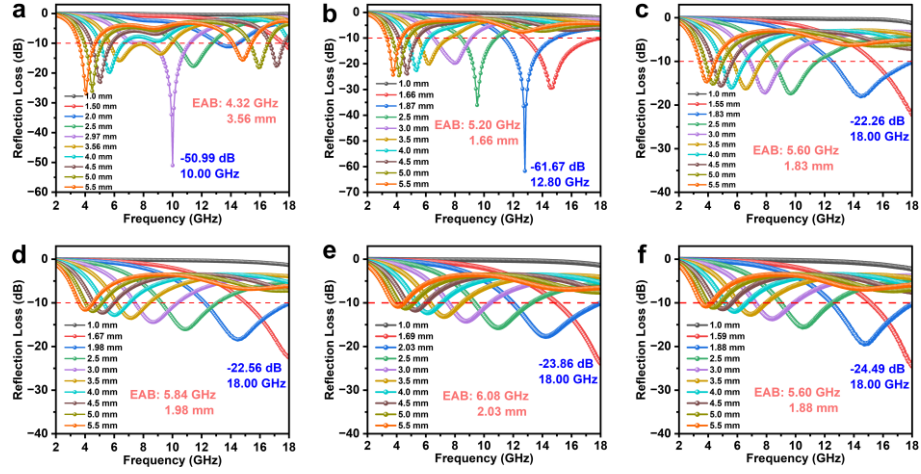

**Fig. S39** The RL curves of a) CZ, b) FCZ1, c) FCZ2, d) FCZ3, e) FCZ4, and f) FCZ5 (at mass-filling ratios of 50%).

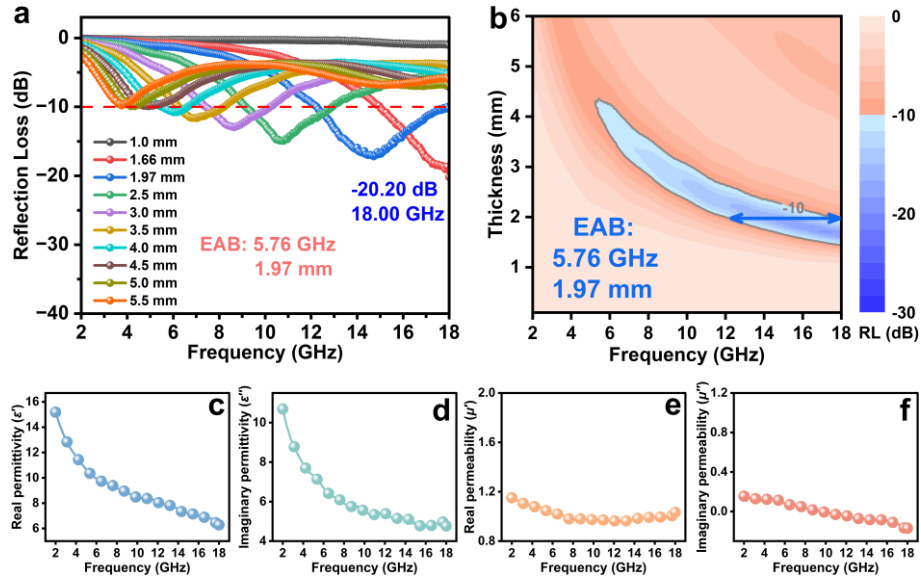

**Fig. S40** a,b) The RL curves and 2D RL mapping of FCZ4. c-f) Electromagnetic parameters at mass-filling ratios of 50% (tested on Agilent E5071C, supplied by Scientific Compass from Hangzhou Research Interest Information Technology Co., Ltd).

The  $RL_{min}$  and EAB obtained from retesting were in good agreement with the previous results, and the electromagnetic parameters were essentially the same, confirming the reliability and repeatability of FCZ4 composites for real-world electromagnetic wave absorption applications.

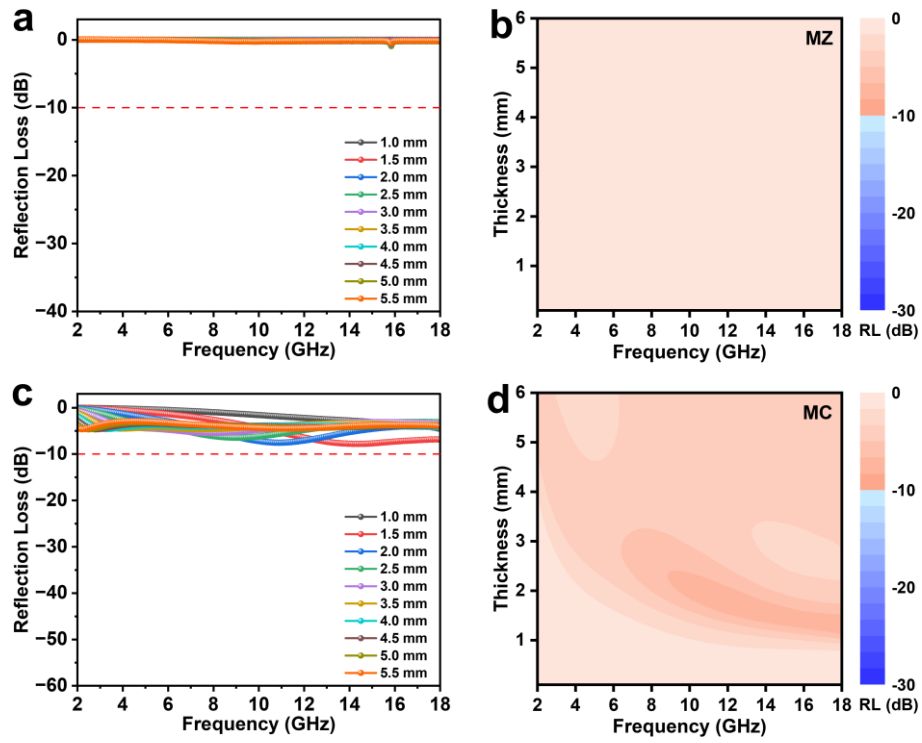

**Fig. S41** The RL curves and 2D RL mapping of a,b) MZ and c,d) MC at mass-filling ratios of 50%.

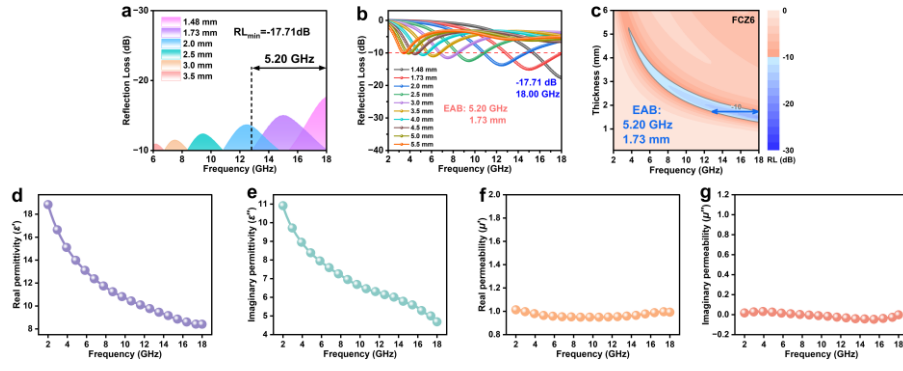

**Fig. S42** a-c) The RL curves and 2D RL mapping of FCZ6. d-g) Electromagnetic parameters at mass-filling ratios of 50%.

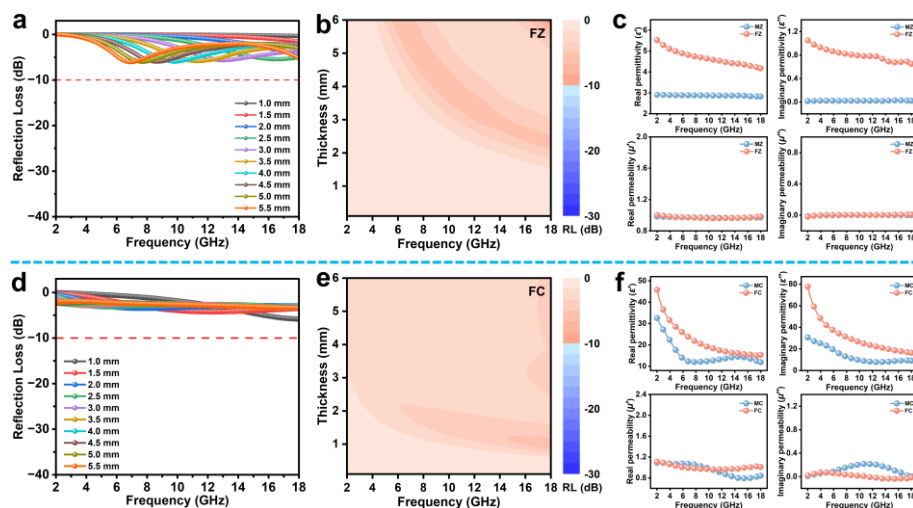

**Fig. S43** The RL curves, 2D RL mapping, and electromagnetic parameters of a-c) FZ and d-f) FC at mass-filling ratios of 50%.

FZ displayed a remarkable improvement in performance over MZ. Although the properties of FC were comparable to those of MC, a significant strengthening of the dielectric response was observed. These results illustrated the effectiveness of introducing  $\text{Fe}^{3+}$  into bimetallic MOF systems in enhancing the dissipation capacity of electromagnetic waves.



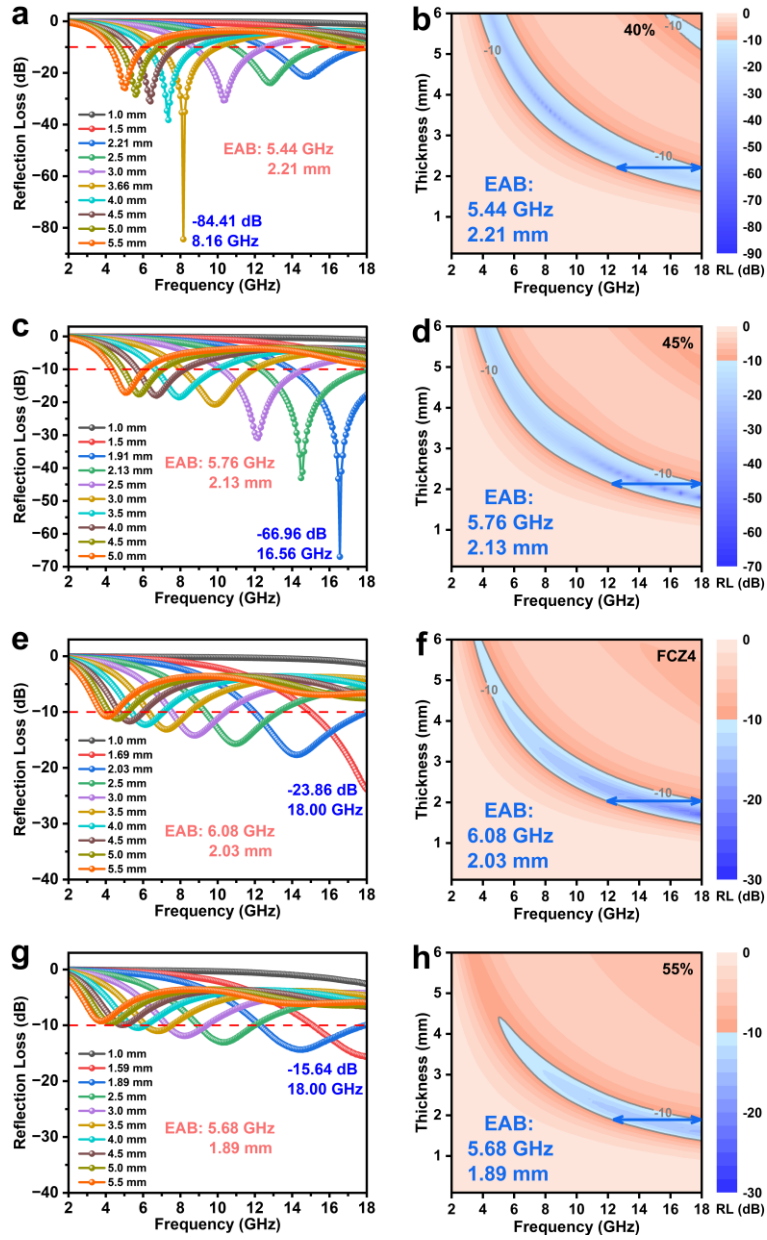

**Fig. S44** The RL curves and 2D RL mapping of FCZ4 at different mass-filling ratios of a,b) 40%, c,d) 45%, e,f) 50%, and g,h) 55%.

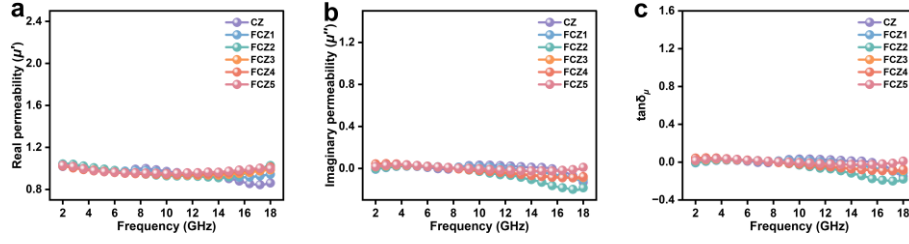

**Fig. S45** a) The real part and b) the imaginary part of the complex permeability. c) The magnetic loss tangent values (at mass-filling ratios of 50%).

This may be due to the Fabry-Pérot resonance (FPR) effect that occurred in this high-loss material during testing [23]. This can lead to the appearance of counterfactual dielectric parameters. Due to the FPR effect, selecting an appropriate thickness was crucial to obtain accurate dielectric parameters based on the test method. For the single TE mode of the waveguide in the band, the wavelength can be expressed as [23, 24]:

$$\lambda_g = 1/Re \left[ \left( \frac{\epsilon_r \mu_r f^2}{v_0^2} - \frac{1}{\lambda_c^2} \right)^{1/2} \right] \quad (21)$$

If the sample thickness was  $\lambda_g/2$ , the FPR will occur, which can manipulate the reflection of the electromagnetic field. For magnetic materials, the optimal thickness of the samples should be  $\lambda_g/4$  at the minimum frequency in the investigated range. A smaller thickness would result in a much greater error, whereas a larger thickness would lead to a counterfactual result due to FPR. In contrast, the sample exhibited higher electromagnetic parameters, resulting in stronger losses, and the FPR errors that occurred are larger. In addition, the inhomogeneity of the sample dimensions can also lead to the appearance of such problems.

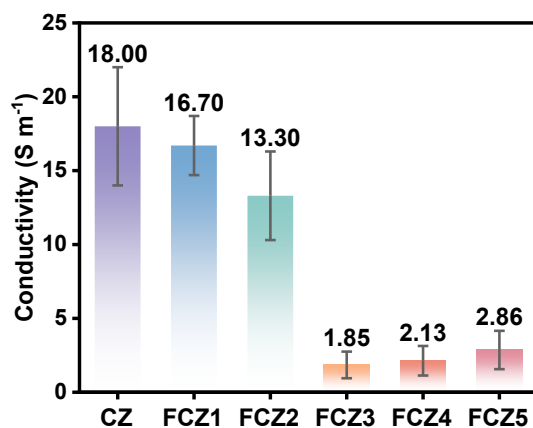

**Fig. S46** Electrical conductivity on samples with 100 wt% filler loading measured by a four-point probe.

The electrical conductivity of pristine samples displayed a characteristic non-monotonic variation with increasing  $\text{Fe}^{3+}$  incorporation concentration, exhibiting a minimum at FCZ3 while paralleling the conductivity evolution observed in 50 wt% paraffin-containing composites. Although the intrinsic conductivity values of the samples reflected their inherent material properties, the electromagnetic parameters were obtained from composite paraffin-based measurements. Thus, the reported conductivity data here primarily served as an indicator for analyzing variation trends.

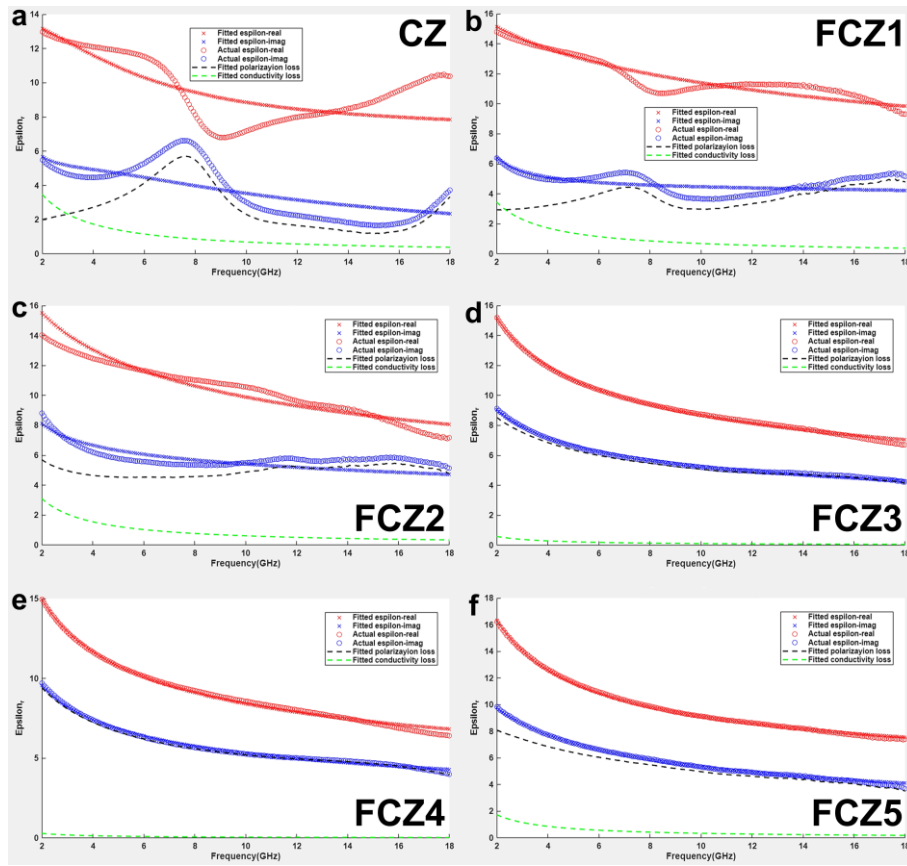

**Fig. S47** Fitting curves using the modified Havriliak-Negami model of a) CZ, b) FCZ1, c) FCZ2, d) FCZ3, e) FCZ4, and f) FCZ5.

The real and imaginary parts of the complex permittivity derived from the fitting exhibited a good overlap with the experimentally measured data, while the fitted conductivity loss and polarization loss closely aligned with the corresponding experimental values. Collectively, this validated the accuracy and reliability of the theoretical model employed to describe the electromagnetic response characteristics of the material systems.

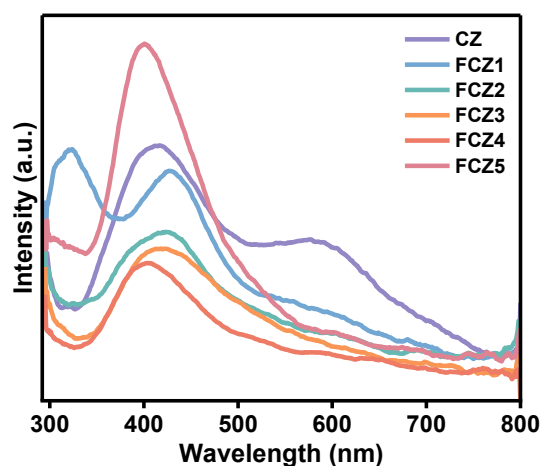

**Fig. S48** PL spectrogram of different samples.

The PL analysis revealed that the absorption peaks in the 350-450 nm spectral range exhibited an increasing and then decreasing trend with elevating  $\text{Fe}^{3+}$  introduction concentration, with the FCZ4 sample displaying the minimum intensity. This phenomenon suggested that the intrinsic defect density underwent progressive enhancement with  $\text{Fe}^{3+}$  incorporation, attaining maximum values at the FCZ4 before subsequent reduction at higher incorporation levels.

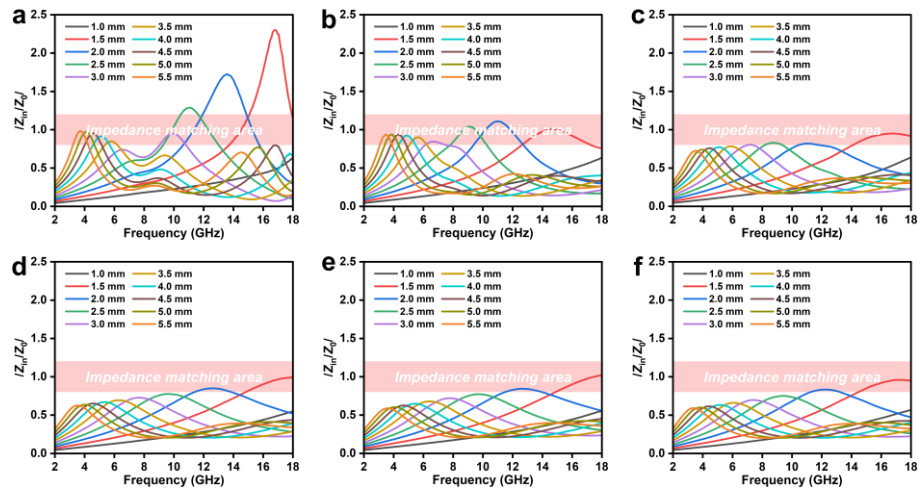

**Fig. S49** The impedance matching of a) CZ, b) FCZ1, c) FCZ2, d) FCZ3, e) FCZ4, and f) FCZ5 (at mass-filling ratios of 50%).

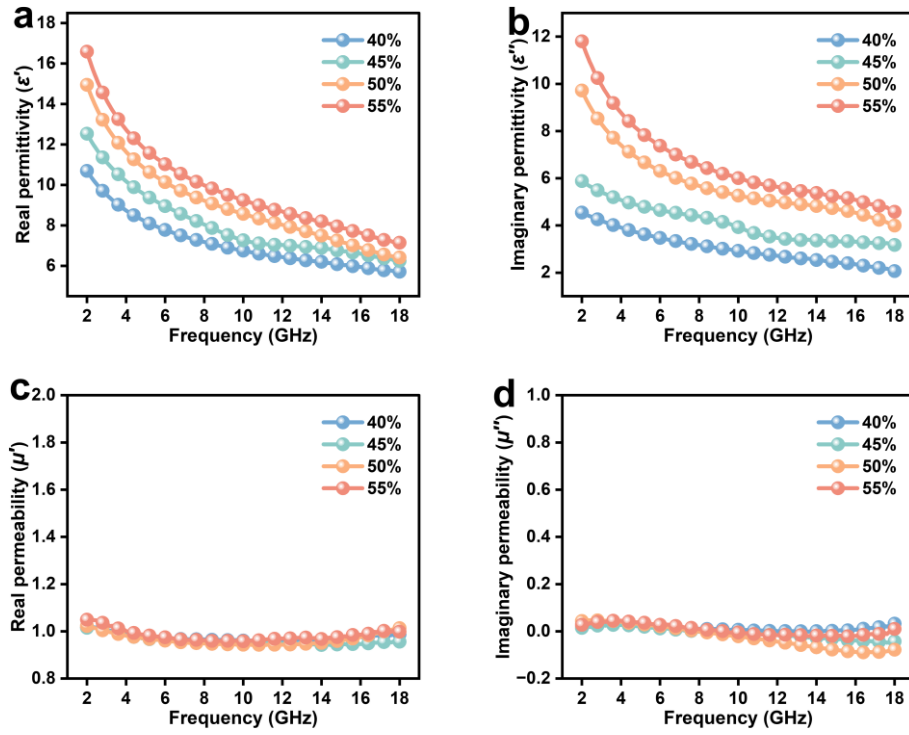

**Fig. S50** a) The real part and b) the imaginary part of the complex permittivity of FCZ4 at different mass-filling ratios. c) The real part and d) the imaginary part of the complex permeability of FCZ4 at different mass-filling ratios.

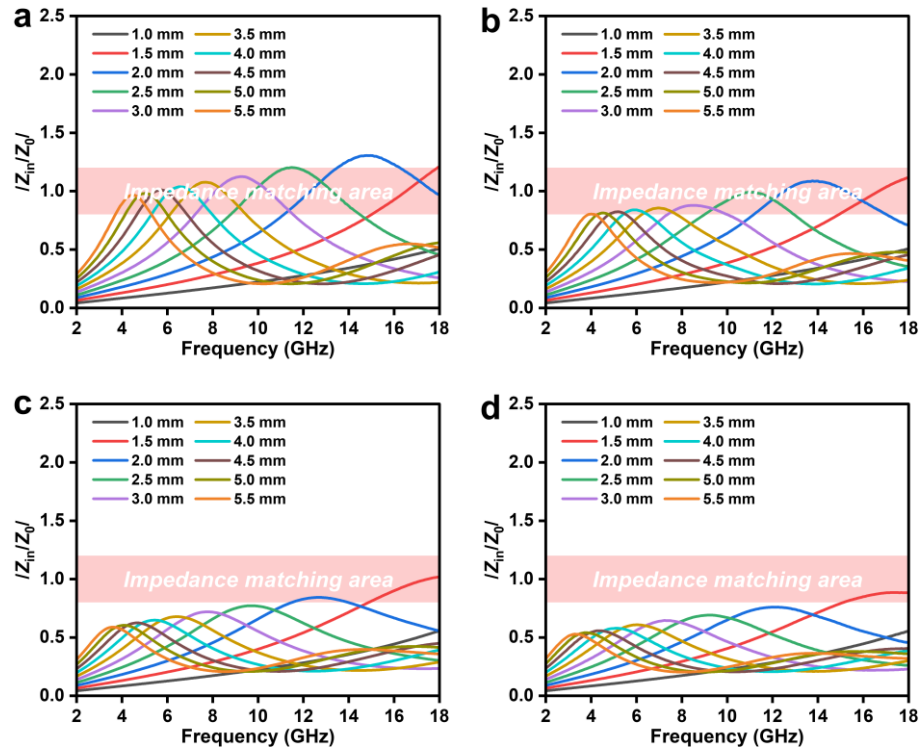

**Fig. S51** The impedance matching of FCZ4 at different mass-filling ratios of a) 40%, b) 45%, c) 50%, and d) 55%.



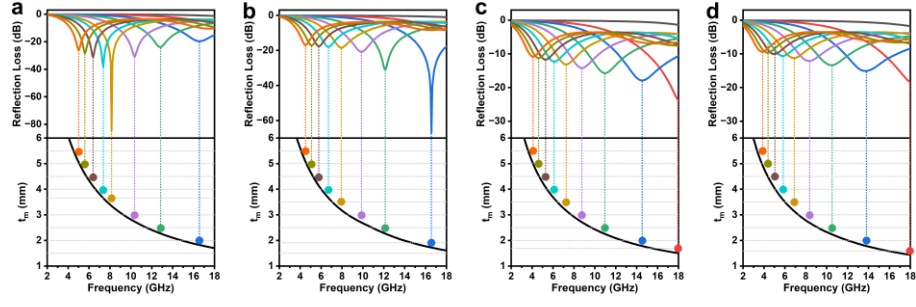

**Fig. S52** Dependence of  $\lambda/4$  matching thickness on RL peaks for FCZ4 at different mass-filling ratios of a) 40%, b) 45%, c) 50%, and d) 55%.

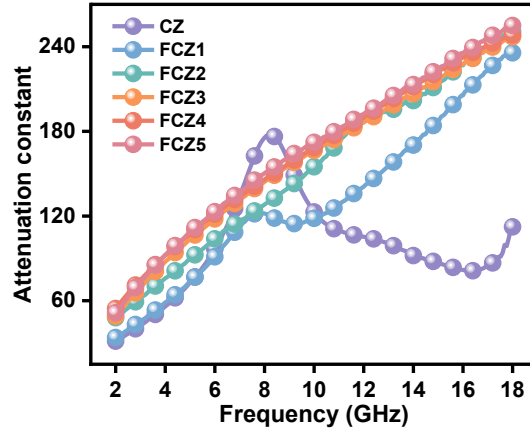

**Fig. S53** The attenuation constant of different samples (at mass-filling ratios of 50%).

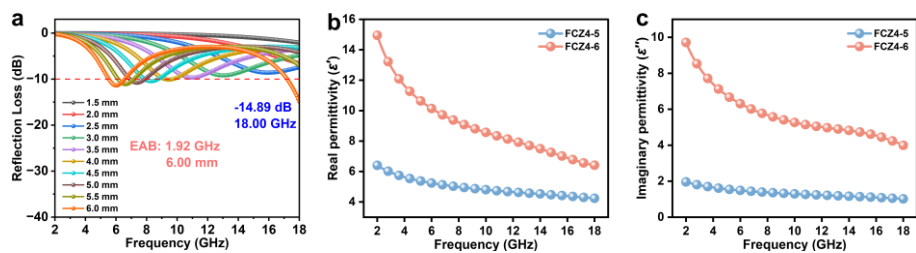

**Fig. S54** a) The RL curves of FCZ4-5. b) The real part and c) the imaginary part of the complex permittivity of FCZ4-5 and FCZ4-6 (at mass-filling ratios of 50%).

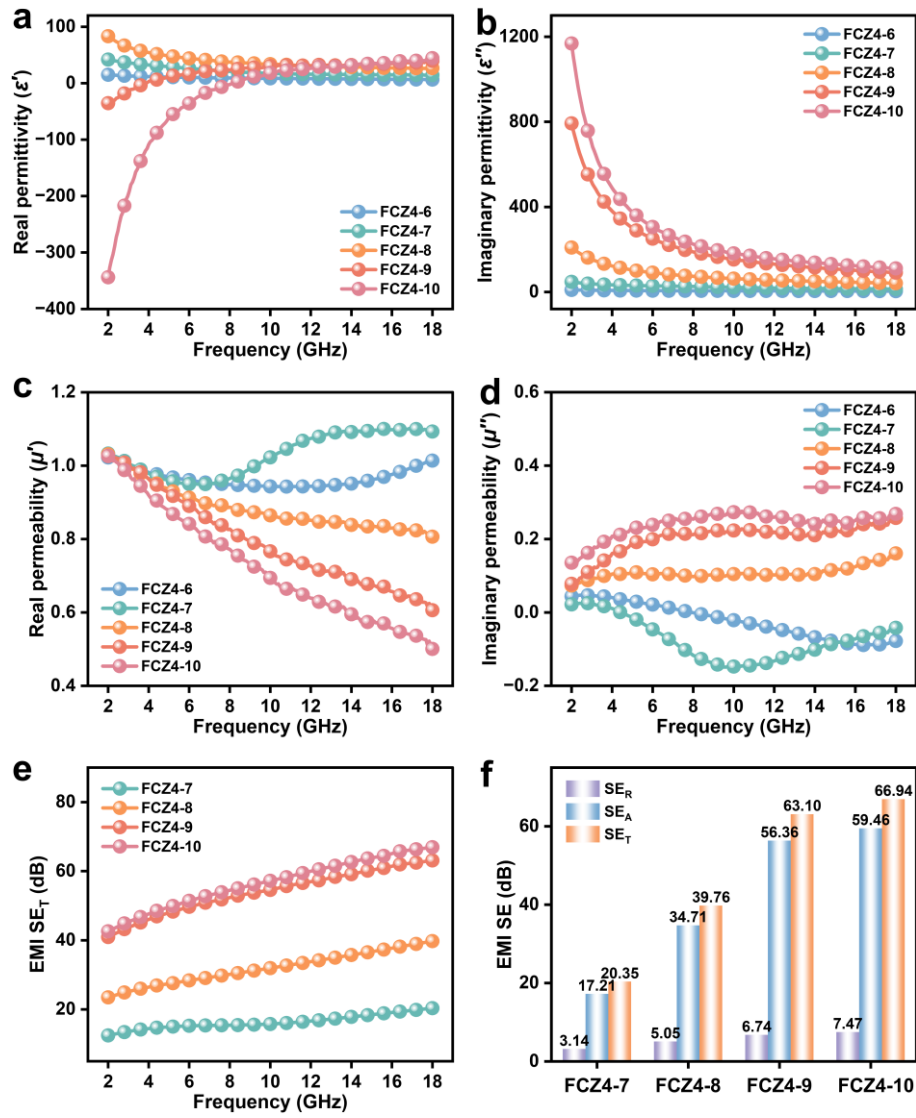

**Fig. S55** Electromagnetic shielding properties of samples obtained at different heat treatment temperatures at mass-filling ratios of 50%. a) The real part and b) the imaginary part of the complex permittivity. c) The real part and d) the imaginary part of the complex permeability. e) EMI  $SE_T$  curves, and f) a summary of maximum EMI  $SE_T$ ,  $SE_A$ , and  $SE_R$  values of FCZ4-y.

Electromagnetic shielding parameters were also obtained through coaxial method testing, which outputs both complex permittivity and permeability, as well as S-parameters, in a single measurement. All samples were filled with 50 wt% paraffin wax and had a thickness of 2.70 mm.

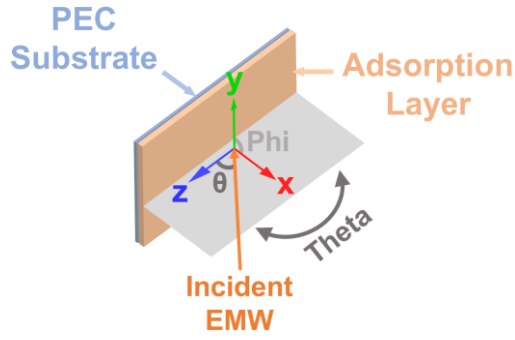

**Fig. S56** Radar cross section simulation model.

The flat plate models (with a total size of  $180 \times 180 \times 3.03 \text{ mm}^3$ ) included absorbers ( $180 \times 180 \times 2.03 \text{ mm}^3$ ) as the absorption layer and perfect electric conductor (PEC,  $180 \times 180 \times 1.0 \text{ mm}^3$ ) as the reflection layer. The model was placed in the Y-O-Z plane with EMW incident from the Z-axis direction. Keeping the polarization angle  $\phi$  constant while varying the incident angle  $\theta$  ( $0^\circ$ - $180^\circ$ ) of the EMW. Here,  $0^\circ$  indicated a direction parallel to the Z-axis, while  $90^\circ$  denoted a direction parallel to the X-axis. At this angle ( $90^\circ$ ), the incident direction of the EMW was perpendicular to the model.

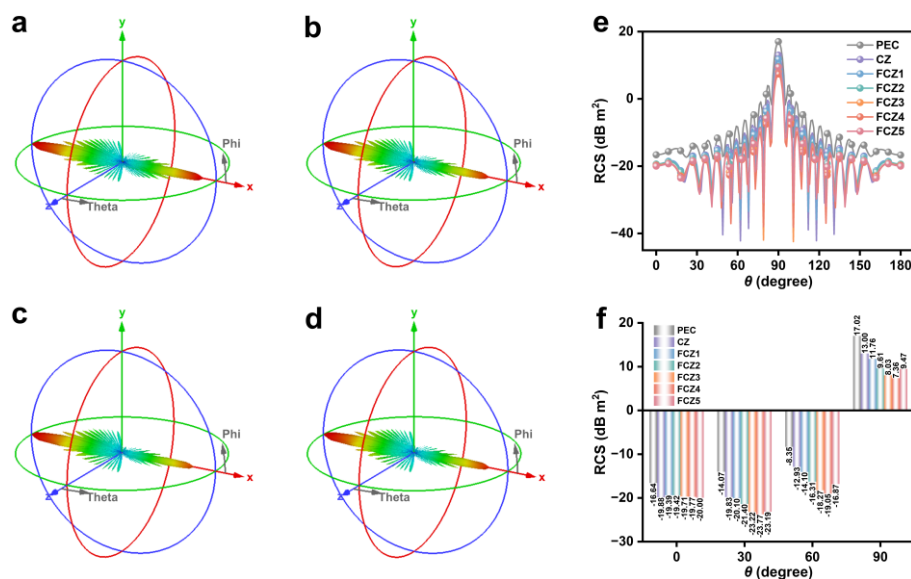

**Fig. S57** 3D radar scattering signal of a) FCZ1, b) FCZ2, c) FCZ3, and d) FCZ5. e) RCS simulation curves of different samples. f) RCS values under certain detection angles.

The RCS values of all the samples were found to be greater than those of the PEC, where the signal could be reduced by 3.36 dB m<sup>2</sup> at 0°, 9.70 dB m<sup>2</sup> at 30°, 10.70 dB m<sup>2</sup> at 60°, and 9.66 dB m<sup>2</sup> at 90°. This demonstrated that the as-synthesized composites were well-adapted to the outfield environment and held significant potential for practical applications.

**Table S1 Sample name correspondence table**

| Sample name | Zn(OAc) <sub>2</sub> ·2H <sub>2</sub> O (mmol) | Co(NO <sub>3</sub> ) <sub>2</sub> ·6H <sub>2</sub> O (mmol) | Fe(acac) <sub>3</sub> (mmol) | 2-Methylimidazole (mmol) | Heating temperature (°C) |
|-------------|------------------------------------------------|-------------------------------------------------------------|------------------------------|--------------------------|--------------------------|
| MZ          | 24                                             | /                                                           | /                            | 100                      | 600                      |
| FZ          | 24                                             | /                                                           | 2.4                          | 100                      | 600                      |
| MC          | /                                              | 24                                                          | /                            | 100                      | 600                      |
| FC          | /                                              | 24                                                          | 2.4                          | 100                      | 600                      |
| CZ          | 12                                             | 12                                                          | /                            | 100                      | 600                      |
| FCZ1        | 12                                             | 12                                                          | 0.6                          | 100                      | 600                      |
| FCZ2        | 12                                             | 12                                                          | 1.2                          | 100                      | 600                      |
| FCZ3        | 12                                             | 12                                                          | 1.8                          | 100                      | 600                      |
| FCZ4        | 12                                             | 12                                                          | 2.4                          | 100                      | 600                      |
| FCZ5        | 12                                             | 12                                                          | 3.0                          | 100                      | 600                      |
| FCZ6        | 12                                             | 12                                                          | 3.6                          | 100                      | 600                      |
| FCZ4-5      | 12                                             | 12                                                          | 2.4                          | 100                      | 500                      |
| FCZ4-6      | 12                                             | 12                                                          | 2.4                          | 100                      | 600                      |
| FCZ4-7      | 12                                             | 12                                                          | 2.4                          | 100                      | 700                      |
| FCZ4-8      | 12                                             | 12                                                          | 2.4                          | 100                      | 800                      |
| FCZ4-9      | 12                                             | 12                                                          | 2.4                          | 100                      | 900                      |
| FCZ4-10     | 12                                             | 12                                                          | 2.4                          | 100                      | 1000                     |

Remark:

- (1) The precursors of all samples were denoted as "name-Z" (e.g., MZ-Z, CZ-Z, and FCZ-Zx).
- (2) FCZ4 and FCZ4-6 represented the same sample.

**Table S2 Mass content of the Zn, Co, and Fe elements obtained from ICP tests**

| Samples | Zn (wt%)   | Co (wt%)   | Fe (wt%)  |
|---------|------------|------------|-----------|
| CZ      | 17.36±0.02 | 13.56±0.04 | /         |
| FCZ1    | 14.73±0.01 | 10.43±0.09 | 0.42±0.01 |
| FCZ2    | 15.21±0.01 | 10.09±0.02 | 1.49±0.01 |
| FCZ3    | 14.80±0.03 | 9.33±0.03  | 1.83±0.01 |
| FCZ4    | 15.51±0.04 | 9.56±0.10  | 2.76±0.01 |
| FCZ5    | 16.00±0.02 | 9.46±0.02  | 3.27±0.03 |



**Table S3 Atomic content of C, N, O, Zn, Co, and Fe elements calculated by XPS**

| Samples | C (at%) | N (at%) | O (at%) | Zn (at%) | Co (at%) | Fe (at%) |
|---------|---------|---------|---------|----------|----------|----------|
| MZ      | 60.43   | 23.12   | 8.48    | 7.97     | /        | /        |
| FZ      | 67.32   | 17.96   | 8.19    | 5.69     | /        | 0.84     |
| MC      | 74.68   | 13.65   | 8.77    | /        | 2.90     | /        |
| FC      | 76.69   | 11.08   | 8.42    | /        | 2.30     | 1.51     |
| CZ      | 67.78   | 17.34   | 9.21    | 4.33     | 1.34     | /        |
| FCZ1    | 67.03   | 17.36   | 8.84    | 4.42     | 1.54     | 0.82     |
| FCZ2    | 68.42   | 16.57   | 8.53    | 4.11     | 1.35     | 1.02     |
| FCZ3    | 64.69   | 18.79   | 9.44    | 4.80     | 1.19     | 1.09     |
| FCZ4    | 66.35   | 17.77   | 8.66    | 4.76     | 1.31     | 1.16     |
| FCZ5    | 66.66   | 17.18   | 8.51    | 5.20     | 1.24     | 1.20     |

**Table S4 Saturation magnetization ( $M_s$ ) and coercivity ( $H_c$ ) obtained from the  $M$ - $H$  curves**

| Samples | Saturation magnetization<br>(emu g <sup>-1</sup> ) | Coercivity<br>(Oe) |
|---------|----------------------------------------------------|--------------------|
| CZ      | 13.33                                              | 30.9               |
| FCZ1    | 13.67                                              | 31.0               |
| FCZ2    | 15.70                                              | 23.0               |
| FCZ3    | 17.51                                              | 7.5                |
| FCZ4    | 18.21                                              | 3.1                |
| FCZ5    | 20.48                                              | 2.7                |

**Table S5 Summary of per-atom and per-formula-unit formation energy after normalization of different models**

| <b>Models</b>                      | <b>Per-atom formation energy<br/>(eV atom<sup>-1</sup>)</b> | <b>Per-formula-unit formation energy<br/>(eV formula unit<sup>-1</sup>)</b> |
|------------------------------------|-------------------------------------------------------------|-----------------------------------------------------------------------------|
| C                                  | -157.759388243325                                           | -157.759388243325                                                           |
| Zn                                 | -1,787.298703868000                                         | -1,787.298703868000                                                         |
| Fe                                 | -861.171167706500                                           | -861.171167706500                                                           |
| Co                                 | -1,098.193383181750                                         | -1,098.193383181750                                                         |
| Fe <sub>2</sub> Co <sub>30</sub>   | -103.708551013375                                           | -207.417102026750                                                           |
| Fe <sub>4</sub> Co <sub>28</sub>   | -88.899645151500                                            | -177.799290303000                                                           |
| Fe <sub>8</sub> Co <sub>24</sub>   | -59.282141467125                                            | -118.564282934250                                                           |
| Fe <sub>12</sub> Co <sub>20</sub>  | -29.527519425875                                            | -59.055038851750                                                            |
| Fe <sub>16</sub> Co <sub>16</sub>  | 518.314675273188                                            | 1,036.629350546375                                                          |
| Co <sub>3</sub> ZnC                | 0.054889947915                                              | 0.274449739575                                                              |
| Fe <sub>3</sub> ZnC <sub>0.5</sub> | 0.127027761165                                              | 0.635138805825                                                              |

**Table S6 The comprehensive electromagnetic wave absorption performance comparison between FCZ4 and other previously reported MOF-based absorbers**

| Samples                                                        | RL <sub>min</sub><br>(dB) | EAB<br>(GHz) | Thickness<br>(mm) | Loading<br>(wt%) | Ref.         |
|----------------------------------------------------------------|---------------------------|--------------|-------------------|------------------|--------------|
| CoSe <sub>2</sub> @N-C                                         | -42.30                    | 4.25         | 1.50              | 40               | [1]          |
| CoNiZn@Ti <sub>3</sub> CNT <sub>x</sub> @CF                    | -44.51                    | 4.32         | 1.50              | 15               | [2]          |
| MoC/NC                                                         | -47.56                    | 4.40         | 2.50              | 15               | [3]          |
| CoM@CoNiC-F                                                    | -64.78                    | 4.60         | 2.30              | /                | [4]          |
| Zn/NC                                                          | -50.50                    | 5.10         | 1.90              | 20               | [5]          |
| CeO <sub>2</sub> /Co/C                                         | -71.50                    | 5.20         | 1.60              | 40               | [6]          |
| CoSe <sub>2</sub> @C                                           | -40.10                    | 5.20         | 2.00              | 30               | [7]          |
| FeCo@C                                                         | -50.57                    | 5.35         | 1.80              | 28               | [8]          |
| Fe/Fe <sub>3</sub> Co <sub>7</sub> /Co/C                       | -64.70                    | 5.80         | 2.50              | 40               | [9]          |
| Cu <sub>9</sub> S <sub>5</sub> /C                              | -69.60                    | 5.81         | 1.83              | 20               | [10]         |
| CoFe/C                                                         | -70.80                    | 6.00         | 2.30              | 2.2              | [11]         |
| Fe(PO <sub>3</sub> ) <sub>2</sub> @C/PCF                       | -57.00                    | 6.00         | 1.80              | 15               | [12]         |
| rGO/MD@CNTs                                                    | -51.60                    | 5.90         | 2.00              | 6                | [13]         |
| MXene/CoNi@C                                                   | -38.40                    | 5.80         | 1.50              | 30               | [14]         |
| Co@HNCSs                                                       | -65.40                    | 5.40         | 1.60              | 30               | [15]         |
| MXene/CoFe@C/CNF                                               | -63.90                    | 5.20         | 1.90              | 3.4              | [16]         |
| Ni/C@rGO                                                       | -22.70                    | 5.20         | 1.50              | 15               | [17]         |
| MIL-88A@NiFe<br>@Ti <sub>3</sub> C <sub>2</sub> T <sub>x</sub> | -46.70                    | 5.12         | 1.80              | /                | [18]         |
| C@Co/CIF                                                       | -45.65                    | 4.80         | 1.35              | 30               | [19]         |
| CoNiZnO@NC                                                     | -70.70                    | 4.48         | 1.55              | 30               | [20]         |
| Co/Ni-CNFs                                                     | -40.13                    | 4.40         | 1.60              | 20               | [21]         |
| Ni@CNTs                                                        | -44.40                    | 4.30         | 1.50              | 30               | [22]         |
| <b>FCZ4</b>                                                    | -88.41                    | 5.44         | 2.21              | 40               | This<br>work |
| <b>FCZ4</b>                                                    | -66.96                    | 5.76         | 2.13              | 45               | This<br>work |
| <b>FCZ4</b>                                                    | -23.86                    | 6.08         | 2.03              | 50               | This<br>work |

**Table S7 Detailed fitting parameters using the modified Havriliak-Negami model**

| Samples | $\varepsilon_s$ | $\varepsilon_\infty$ | $\tau$ | $\alpha$ | $\beta$ | $\sigma$ |
|---------|-----------------|----------------------|--------|----------|---------|----------|
| CZ      | 15.2752         | 7.6447               | 0.0327 | 1.0000   | 1.0000  | 0.6145   |
| FCZ1    | 13.4043         | 3.2283               | 0.0094 | 0.9445   | 1.0000  | 0.4816   |
| FCZ2    | 16.9277         | 0                    | 0.0450 | 0.6548   | 1.0000  | 0.3032   |
| FCZ3    | 28.3320         | 4.3519               | 0.2275 | 0.5697   | 0.8455  | 0.1307   |
| FCZ4    | 70.6510         | 0                    | 3.9981 | 0.4367   | 0.7341  | 0.1226   |
| FCZ5    | 89.5869         | 0                    | 7.3359 | 0.4947   | 1.0000  | 0.2388   |

### **Note S1 Analysis of phase compositions in the CZ**

Three phases of amorphous carbon, metallic Co, and Co<sub>3</sub>ZnC intermetallic compounds were observed in the XRD pattern of CZ. Firstly, both amorphous carbon and metallic Co were synthesized by reduction during pyrolysis. The formation of the Co<sub>3</sub>ZnC phase could be primarily ascribed to two key factors: i) The Co<sup>2+</sup> (Co<sup>2+</sup>/Co<sup>0</sup> = -0.277 V) exhibited a higher reduction potential compared to Zn<sup>2+</sup> (Zn<sup>2+</sup>/Zn<sup>0</sup> = -0.762 V), leading to its preferential reduction during the heat treatment process. This initial reduction stage consumed substantial reducing agents and diminished the reducing atmosphere, effectively suppressing subsequent Zn reduction. Under these constrained reduction conditions, the alloying behavior between Zn and Co demonstrated greater thermodynamic favorability than pure Zn reduction. ii) The significant atomic radius difference between Zn (0.139 nm) and Co (0.125 nm) established substantial lattice distortion energy barriers, which significantly impeded solid solution formation. Moreover, the absence of detectable diffraction peaks corresponding to Zn species was mainly due to the incomplete reduction of Zn during synthesis. This incomplete reduction process facilitated the dispersion of the material in an amorphous state or as ultrafine metallic particles across an amorphous carbon matrix, rendering it undetectable by conventional XRD techniques. Complementary XPS analysis confirmed that Zn predominantly existed in an amorphous ZnO configuration (**Fig. S24-S25**). This conclusion was corroborated by the absence of crystalline ZnO features in HRTEM characterization, which aligned with the amorphous structural characteristics identified through spectroscopic studies (**Fig. S16**).

### **Note S2 Effects of Fe<sup>3+</sup> on microstructure and composition of monometallic MOF Systems**

To further elucidate the influence of Fe<sup>3+</sup> incorporation on the structural and compositional of monometallic MOFs and their derivatives, four distinct ZIFs, including monometallic MZ-Z and MC-Z, along with bimetallic FZ-Z and FC-Z systems added with 2.4 mmol of Fe<sup>3+</sup>, were systematically synthesized under identical conditions. Comparative analyses, as shown in **Fig. S8-S10**, revealed that the

incorporation of  $\text{Fe}^{3+}$  led to significant alterations in the crystalline structure and chemical composition of the MZ-Z precursor. Post-pyrolysis characterization revealed the presence of diffraction signatures associated with the  $\text{Fe}_3\text{ZnC}_{0.5}$  and metallic Fe phase. This phase evolution suggested that in the absence of competitive ligand coordination from  $\text{Co}^{2+}$ , Fe and Zn underwent direct alloying processes that preferentially formed the thermodynamically favored  $\text{Fe}_3\text{ZnC}_{0.5}$  phase during high-temperature treatment. Furthermore, the preferential coordination of  $\text{Fe}^{3+}$  with 2-MIM triggered a structural, topological transition in the MZ, transforming from a porous block configuration to a stabilized dodecahedral morphology. During subsequent pyrolysis, the Fe-dominated reinforced framework synergized with its catalytic induction effect on oriented carbon growth, enabling the MZ precursor (which underwent structural collapse into porous nanosheets) to evolve into an FZ that retained the polyhedral architecture of the parent framework.

In the MC and FC composite systems (**Fig. S11-S13**), the introduction of  $\text{Fe}^{3+}$  induced minimal crystal structure alterations in the precursor framework. However, the characterization of pyrolyzed derivatives displayed the emergence of a distinct metallic Fe phase, accompanied by marked attenuation in diffraction peak intensities corresponding to the metallic Co phase. These observations suggested that the insufficient heat treatment temperature, coupled with the confinement effect from the amorphous carbon matrix, collectively suppressed the formation of Fe-Co alloy phases, thereby limiting the reduction process to  $\text{Fe}^0$  generation. Mechanistically, the introduced Fe species could act as grain growth inhibitors, reducing Co crystallite dimensions through Zener pinning effects while inducing lattice strain via substitutional/interstitial defects, which disrupted the long-range periodicity in the Co matrix and macroscopically manifested as diffraction peak broadening. The MC-Z precursor displayed an irregular leaf-like morphology with a certain thickness. Upon pyrolysis, this architecture underwent rapid structural collapse into aggregated clusters, attributed to the generation of detrimental gaseous byproducts (e.g.,  $\text{NO}_x$  species) and the absence of Fe stabilization. The introduction of Fe species modulated the coordination environment of Co centers, thereby suppressing anisotropic growth

tendencies responsible for leaf-like formations. The FC composite maintained the morphology of the parent FC-Z precursor during subsequent thermal processing. Notably, the structural evolution characteristics of Co-based monometallic MOF exhibited remarkable similarity to those observed in Co/Zn bimetallic systems, thereby providing indirect evidence for the predominant coordination capability and reduction activity of Co centers within the bimetallic framework. In summary, Fe<sup>3+</sup> incorporation can effectively control the synthesis of phases and structures in monometallic MOF systems by modulating the coordination environment, enhancing the coordination nodes, and establishing a reduction hierarchy.

### **Note S3 Analysis of hot field regulation results**

Thermal field modulation was strategically implemented to further precisely manipulate the electromagnetic responsiveness of FCZ4 through systematic variation of pyrolysis temperatures. The relatively low temperature of 500 °C failed to provide an adequate thermodynamic driving force for substantial structural evolution, resulting in the microstructure of FCZ4-5 retaining its self-assembled configuration, as directly evidenced by the attenuation of diffraction peak intensities observed in the corresponding XRD (**Fig. S27**). Elevated temperatures within the 700-1000 °C range significantly enhanced carbon atom diffusion kinetics, thereby facilitating the structural reorganization of carbon matrices into graphitized configurations with improved crystallographic ordering. This was evidenced by the reduction in full width at half maximum and the intensity enhancement of characteristic graphitic carbon diffraction peaks observed in XRD. Concurrently, the formation of CNTs preferentially occurred at material surfaces, and the resulting nanotube network built spatial steric hindrance effects that substantially inhibited structural tailoring and reorganization processes within the materials. Moreover, the emergence of Co<sub>7</sub>Fe<sub>3</sub> (PDF#50-0795) diffraction peaks became evident when the temperature exceeded 900 °C, offering evidence that corroborated the formation mechanism of Fe-Co solid solutions during low-temperature synthesis stages. Progressive elevation of the annealing temperature induced a significant improvement in atomic diffusion activation energy within the



system, which drove an ordered phase transformation within the solid solution. This demonstrated that thermal gradients exerted a critical governing influence over phase evolution pathways in composites.

The diminished EMW absorption efficiency observed in FCZ4-5 can be primarily attributed to the insufficient graphitization of the carbon matrix under low-temperature synthesis conditions, which resulted in a reduced dielectric loss capacity (**Fig. S54**). In contrast, elevated temperatures promoted the establishment of a continuous conductive network within the material matrix, substantially enhancing the complex permittivity. This phenomenon triggered a severe impedance mismatch at the material-electromagnetic wave interface, obstructing the subsequent efficient dissipation of electromagnetic energy. However, the synthesized composites, which exhibited pronounced temperature-dependent dielectric properties, were strategically engineered for high-performance electromagnetic shielding (EMI) applications. Surprisingly, the EMI effectiveness displayed temperature-dependent enhancement characteristics, with composite FCZ4-10 demonstrating superior performance by achieving a maximum total shielding efficiency of 66.94 dB (**Fig. S55**). This thermal-responsive behavior revealed that controlled thermal modulation effectively governed the dielectric response mechanisms of the material. As a result, it enabled dual-function switching between EMW absorption and shielding modes, advancing the development of multifunctional EMW management materials through temperature-mediated property control.

#### **Note S4 Analysis of DFT calculation results**

The formation energy of each material was determined through geometry optimization under consistent computational parameters. For the Fe-Co solid solution,  $\text{Co}_3\text{ZnC}$ , and  $\text{Fe}_3\text{ZnC}_{0.5}$  systems, the final formation energies were calculated by first subtracting the formation energies of constituent free atoms, followed by comparing them in normalized per-atom or per-formula-unit formation energies. This approach effectively eliminated systematic errors arising from supercell size effects while maintaining comparability across different crystalline configurations. Based on the

XPS analysis, which revealed a progressive increase in  $\text{Fe}^{3+}$  content accompanied by the Fe/Co atomic ratio approaching 1:1, a  $2 \times 2 \times 2$  supercell of Co was constructed and subsequently subjected to doping with randomly distributed Fe atoms. The final formation energy results were summarized in **Table S5**. Computational analysis revealed that the Fe-Co solid solution phase exhibited substantially lower formation energy than the  $\text{Co}_3\text{ZnC}$  and  $\text{Fe}_3\text{ZnC}_{0.5}$  phases. This energetically favorable configuration thermodynamically stabilized the Fe-Co solid solution as the dominant phase upon  $\text{Fe}^{3+}$  incorporation, demonstrating superior phase stability over competing compounds. Notably, when Fe atoms were doped in a disordered manner up to a 50% concentration (i.e.,  $\text{Fe}_{16}\text{Co}_{16}$ ), the system manifested increased structural complexity characterized by pronounced lattice distortion and localized atomic clustering. Such structural disorder generated heterogeneous stress distribution within the crystalline matrix directly correlated with a dramatic rise in formation energy. Therefore, these results confirmed that the Fe-Co solid solution phase was preferentially nucleated and stabilized within the trimetallic MOF architecture while simultaneously exerting dominance over the subsequent phase transformation pathways.

First-principles calculations on the pure Co system revealed a higher density of electronic states in the spin-down channel than the spin-up channel, indicating more substantial spin-polarized band dispersion in the former (**Fig. S29a** and **S30a**). In ferromagnetic Co, exchange interactions induced spin-polarized splitting of  $3d$  orbital energy levels into spin-up and spin-down channels. The  $3d^7$  electronic configuration of Co resulted in near-complete occupancy of spin-up  $d$ -orbitals, with filled states primarily situated below the Fermi level. In contrast, spin-down  $d$ -orbitals demonstrated partial occupancy, exhibiting electronic states proximal to the Fermi energy. This partial filling manifested as enhanced band dispersion within the spin-down channel, yielding a higher density of states near the Fermi level than the spin-up channel. This electronic structure characteristic also presented in Fe systems, reflecting fundamental principles governing ferromagnetic materials (**Fig. S33**).

The densification of spin-down energy bands exhibited a pronounced enhancement correlated with incremental Fe doping concentrations (**Fig. S29b-f**). This

was mainly attributed to the following: i) The spin polarization was further exacerbated by the  $3d^6$  electron configuration of Fe and its stronger local magnetic moment. Upon Fe doping, the hybridization between Fe and Co strengthened the exchange interaction, inducing a marked splitting of the energy levels in the spin-down channel. This shifted the unoccupied states closer to the Fermi level, thereby increasing the density of the spin-down energy band as the Fe content rises. ii) The  $3d$  orbitals of Fe exhibited hybridization with Co's  $3d$  orbitals, with particularly pronounced interactions in the spin-down channel. This orbital hybridization induced a characteristic splitting of energy bands into distinct bonding and antibonding states. The bonding states, predominantly composed of spin-up configurations, were stabilized at lower energy levels positioned below the Fermi level. Conversely, antibonding states, primarily characterized by spin-down, occupy higher-energy states near or crossing the Fermi level. Notably, the antibonding states demonstrated a higher density of states (DOS) and exhibited progressively enhanced hybridization with increasing Fe concentration (**Fig. S30-S32**). This intensifying interaction introduced greater complexity to the spin-down band structure through two primary mechanisms. First, Fe doping introduced additional unoccupied d-orbitals, which generated supplementary unoccupied states in the spin-down channel via orbital hybridization. Second, these hybridized states facilitated energy band crossover phenomena and reduced electronic state degeneracy, ultimately manifesting as an enhanced density of states near the Fermi level. iii) The atomic radii of Fe ( $\approx 1.24$  Å) and Co ( $\approx 1.25$  Å) were nearly identical; however, doping Fe with Co introduced local lattice distortions characterized by variations in bond lengths or angles. These structural perturbations lowered the crystal symmetry, which in turn diminished the simplicity of the electronic band structure. In such a low-symmetry environment, initially, degenerate energy levels underwent further splitting, generating additional sub-bands. This phenomenon was particularly pronounced in the spin-down channel, where symmetry reduction amplified the complexity of the electronic states.

The total DOS exhibited a slight decline with increasing Fe doping concentration. This trend was attributed to localized lattice distortions induced by Fe incorporation,

which disrupted the crystalline symmetry and generated structural heterogeneity. Such atomic-scale modifications promoted the dispersion of electronic states, resulting in a measurable reduction of peak DOS intensities. Notably, this electronic structure modulation became most significant at intermediate doping levels (50% Fe substitution,  $\text{Fe}_{16}\text{Co}_{16}$ ), where the synergistic effects of lattice strain and symmetry breaking reached optimal manifestation. Furthermore, the d-orbitals constituted the primary contribution to the total DOS, arising from the combined d-orbital contributions of Co and Fe. The spin-down channel maintained its dominance at the Fermi level, a characteristic that aligned with the electronic band structure analysis. Intriguingly, the projected density of states (PDOS) of Co exhibited a progressive decrease, whereas that of Fe demonstrated a concurrent enhancement. These mutually counteracting trends effectively mitigated substantial variations in the total DOS, maintaining its overall stability.

In the PDOS analysis of Fe and Co, the spin-up channel dominated the low-energy regime (-7 to -1 eV), characterized by fully occupied bonding states with strong d-orbital localization. Conversely, the spin-down channel exhibited partial d-orbital occupation due to spin-polarization effects, manifesting as an intense DOS peak near the Fermi level. This spin-asymmetric electronic structure resulted in spin-down states governing the electronic behavior at the Fermi energy. The 3d orbitals of Fe underwent hybridization with the 3d orbitals of Co, with the Fe d-orbitals exhibiting stronger electron localization and enhanced spin polarization, positioning them closer to the Fermi level. This electronic configuration resulted in a progressive intensification of the PDOS for the Fe 3d orbitals within the hybridized system. While the bonding states of Co in the low-energy regime and the antibonding states near the Fermi level remained dominant contributors, the overall PDOS for Co exhibited a slight reduction. This attenuation primarily stemmed from two concurrent mechanisms: i) partial electron transferred from Co's d-orbitals to Fe-Co hybridized states, and ii) the emergence of a pronounced density of states peak near the Fermi energy level, predominantly formed by antibonding states derived from Fe. The gradient in charge distribution at the Fe-Co hybrid interface established a pronounced dipole moment, facilitating polarization

relaxation processes at the interfacial region and enhancing dielectric loss characteristics.

The electronic band structures and DOS of  $\text{Co}_3\text{ZnC}$  and  $\text{Fe}_3\text{ZnC}_{0.5}$  were also studied using the same calculations (**Fig. S34-S35**). Computational results demonstrated that  $\text{Fe}_3\text{ZnC}_{0.5}$  possessed flatter energy bands near the Fermi level compared to  $\text{Co}_3\text{ZnC}$ , coupled with a significantly enhanced DOS peak in this critical energy region. These distinct electronic features, specifically the reduced band dispersion and elevated density of electronic states at the Fermi level, implied a greater population of charge carriers contributing to electrical conduction in  $\text{Fe}_3\text{ZnC}_{0.5}$ . This fundamental understanding of electronic behavior provided a theoretical explanation for the experimentally observed progressive improvement in electrical conductivity across the FCZ4 and FCZ5 systems.

#### **Note S5 Python code for fitting the Havriliak-Negami model**

```
import numpy as np
import matplotlib.pyplot as plt
from scipy.optimize import curve_fit
import pandas as pd

file_path = input("Input .xlsx file path: ")
S1 = pd.read_excel(file_path, header=None).to_numpy()
f = S1[:, 0]
e_real_data = S1[:, 1]
e_imag_data = S1[:, 2]

def epsilon(params, f):
    return params[0] + (params[1] - params[0]) / ((1 + (1j * 2 * np.pi * f *
params[2]) ** params[3]) ** params[4]) - 1j * params[5] / (2 * np.pi * f * 0.008854)

#Users can set initial values here (x1, x2, x3, x4, x5, x6).
```

```

initial_guess = [x1, x2, x3, x4, x5, x6]
lb = [0, 0, np.finfo(float).eps, 0, 0, np.finfo(float).eps]
ub = [50, 100, 10, 1, 1, 100]

error_threshold = 5

def fit_func(f, epsilon_inf, epsilon_s, tau, alpha, beta, sigma):
    params = [epsilon_inf, epsilon_s, tau, alpha, beta, sigma]
    eps = epsilon(params, f)
    return np.concatenate([np.real(eps), np.imag(eps)])

params_fit_int = initial_guess
error_real = np.inf
error_imag = np.inf

for iter in range(100):
    popt, _ = curve_fit(lambda f, *params: fit_func(f, *params), f,
np.concatenate([e_real_data, -e_imag_data]),
    p0=params_fit_int, bounds=(lb, ub))
    fitted_epsilon_real = abs(np.real(epsilon(popt, f)))
    fitted_epsilon_imag = abs(np.imag(epsilon(popt, f)))
    error_real = np.sum(np.abs(fitted_epsilon_real - e_real_data)) /
np.sum(np.abs(e_real_data)) * 100
    error_imag = np.sum(np.abs(np.abs(fitted_epsilon_imag) - e_imag_data)) /
np.sum(np.abs(e_imag_data)) * 100
    print(f'Current iteration count: {iter + 1}')
    print(f'Real error: {error_real:.4f}%',)
    print(f'Imag error: {error_imag:.4f}%',)
    if error_real < error_threshold and error_imag < error_threshold:
        print('The fitting accuracy has reached below 5%, stop fitting')

```

```

        break

epsilon_inf_fit, epsilon_s_fit, tau_fit, alpha_fit, beta_fit, sigma_fit = popl

print(f'Fitted epsilon_s: {epsilon_s_fit}')
print(f'Fitted epsilon_infinity: {epsilon_inf_fit}')
print(f'Fitted tau: {tau_fit}')
print(f'Fitted alpha: {alpha_fit}')
print(f'Fitted beta: {beta_fit}')
print(f'Fitted sigma: {sigma_fit}')

# Real
plt.subplot(2, 1, 1)
plt.plot(f, e_real_data, 'bo', label='Exp')
plt.plot(f, fitted_epsilon_real, 'r-', label='Fit')
plt.legend()

# Imaginary
plt.subplot(2, 1, 2)
plt.plot(f, e_imag_data, 'bo', label='Exp')
plt.plot(f, fitted_epsilon_imag, 'r-', label='Fit')
plt.legend()

plt.tight_layout()

plt.show()

```

## References

1. Jia H, Duan Y, Chen W, Di J, Wang M (2024) Multi-dimensional nano-microstructures design of MOF-derived CoSe<sub>2</sub>@N-C composites toward excellent microwave absorption. *Mater Today Phys* 43:101415. <https://doi.org/10.1016/j.mtphys.2024.101415>
2. Tan R, Bai W, Yan J, Geng L, Jiang S, Guo R (2024) Flexible CoNiZn@Ti<sub>3</sub>CNT<sub>x</sub> MXene@carbon fabrics with hierarchical structure for efficient electromagnetic wave absorption. *Chem Eng J* 500:157444. <https://doi.org/10.1016/j.cej.2024.157444>
3. Zhang Y, Tian Y, Xu N, Cui P, Guo L, Ma J, Kang Y, Qin L, Wu F, Zhang L, Huang W (2025) In situ mechanical foaming of hierarchical porous MoC for assembling ultra-light, self-cleaning, heat-insulation, flame-retardant, and infrared-stealth device. *Adv Funct Mater* 35(6):2414910. <https://doi.org/10.1002/adfm.202414910>
4. Li K, Han L, Wang T, Zhang J, Cheng J (2024) 4D printing MOF-derived/multi-fluorination nanocomposites for ultra-efficient electromagnetic wave absorption and robust environment adaptivity. *J Mater Chem A* 12(11):6302-6317. <https://doi.org/10.1039/d3ta06898f>
5. Lou Y, Li J, Li X, Zhu Z, Shi Z, Xu B (2024) Single-atom Zn confined in hierarchical hollow microstructure as an acid/base-resistant microwave absorption materials. *Nano Res* 17(8):6785-6794. <https://doi.org/10.1007/s12274-024-6689-z>
6. Li L, Liu J, Pan F, Qiao J, Zhang X, Lin J, Liu W, Wu Q, Tao S, Wu F, Zeng Z (2024) Structural engineering of rare earth metal-organic frameworks derivatives with high anisotropy for high-efficiency electromagnetic wave absorption. *Chem Eng J* 481:148383. <https://doi.org/10.1016/j.cej.2023.148383>
7. Chen Y, Rao H, Wang B, Jin W, Nan K, Wang Y (2024) Hierarchical multi-interface Co<sub>1-x</sub>S/Co<sub>9</sub>S<sub>8</sub>@C hollow microsphere for enhancing dielectric polarization as an efficient microwave absorber. *Carbon* 229:119475. <https://doi.org/10.1016/j.carbon.2024.119475>
8. Wang R, He Y, Tang C, Wu X, Zhuang Q, Liu X, Liu X, Zuo P (2024) Constructing crystalline/amorphous heterojunction in FeCo@C nanoboxes for enhanced



- electromagnetic wave absorption. Carbon 229:119494.  
<https://doi.org/10.1016/j.carbon.2024.119494>
9. Liu G, Zhu P, Teng J, Xi R, Wang X, Wang X, Yan M, Wu C (2025) Optimizing MOF-derived electromagnetic wave absorbers through gradient pore regulation for Pareto improvement. Adv Funct Mater 35(18):2413048.  
<https://doi.org/10.1002/adfm.202413048>
  10. Wu S, Wang C, Tang Y, Jiang J, Jiang H, Xu X, Cui B, Jiang Y, Wang Y (2024) Meta-organic framework-derived hierarchical Cu<sub>9</sub>S<sub>5</sub>/C nanocomposite fibers for enhanced electromagnetic wave absorption. Adv Fiber Mater 6(2):430-443.  
<https://doi.org/10.1007/s42765-023-00362-9>
  11. Qiao J, Song Q, Zhang X, Zhao S, Liu J, Nyström G, Zeng Z (2024) Enhancing interface connectivity for multifunctional magnetic carbon aerogels: An in situ growth strategy of metal-organic frameworks on cellulose nanofibrils. Adv Sci 11(19):2400403. <https://doi.org/10.1002/advs.202400403>
  12. Zhang X, Yao K, Wang X, Wang J, Guo H, Ma X, Yang Y, Wu H, Lu W (2024) Phytic acid-assisted hybrid engineering of MOF-derived composites for tunable electromagnetic wave absorption. J Mater Sci Technol 186:164-173.  
<https://doi.org/10.1016/j.jmst.2023.10.054>
  13. Guo Y, Duan Y, Liu X, Tian J, Wen N, Fan Z, Pan L (2024) Construction of rGO/MOF-derived CNTs aerogel with multiple losses for multi-functional efficient electromagnetic wave absorber. Carbon 230:119591.  
<https://doi.org/10.1016/j.carbon.2024.119591>
  14. Zheng J, Xu C, Li Z, Gu C, Li X, Li Z, Li Y, Lou G, Chen Y (2024) Growing bimetallic CoNi-MOF derivatives between MXene layers with hierarchically coral-like interfaces for enhanced electromagnetic wave absorption. J Mater Chem A 12(42):29103-29112. <https://doi.org/10.1039/d4ta05088f>
  15. Wu X, Lin J, He Y, Wang R, Zhou Y, Qi H, Chen Y, Zuo P, Liu X, Zhuang Q (2024) Revealing electrostatic-manipulated self-assembly mechanism helps to readily design enhanced MOF-derived microwave absorbers. Carbon 227:119289.  
<https://doi.org/10.1016/j.carbon.2024.119289>

16. Qiao J, Song Q, Xuan L, Liu J, Zhang X, Zheng S, Lin J, Cai W, Zhang Q, Zeng Z, Wu N (2024) Dual cross-linked magnetic MXene aerogel with high strength and durability enables multifunctionality. *Adv Funct Mater* 34(33):2401687. <https://doi.org/10.1002/adfm.202401687>
17. Wang P, Fan D, Gai L, Hu B, Xu P, Han X, Du Y (2024) Synthesis of graphene oxide-mediated high-porosity Ni/C aerogels through topological MOF deformation for enhanced electromagnetic absorption and thermal management. *J Mater Chem A* 12(14):8571-8582. <https://doi.org/10.1039/d4ta00125g>
18. Sun C, Lan D, Jia Z, Gao Z, Wu G (2024) Kirkendall effect-induced ternary heterointerfaces engineering for high polarization loss MOF-LDH-MXene absorbers. *Small* 20(48):2405874. <https://doi.org/10.1002/smll.202405874>
19. Sun K, Xie Z, Yang X, Long Y, Yang P, Cheng C, Qi X (2025) Enhanced microwave absorption in C@Co/carbonyl iron fiber composite with multi-level interfaces. *Adv Compos Hybrid Mater* 8(1):29. <https://doi.org/10.1007/s42114-024-01124-w>
20. Yan J, Bai W, Cui C, Jiang S, Wang W, Tang H, Guo R (2024) Metal-organic framework-derived lilac flower-like CoNiZnO@nitrogen-doped carbon composites via a trapping microwave strategy for efficient absorption. *J Mater Chem A* 12(42):28794-28804. <https://doi.org/10.1039/d4ta05222f>
21. Sun R, Ming X, Yan G, Wang L, Cheng J, Zhang X, Li D, Li H, Li Z, Chen J, Wu Y (2024) Efficient nanofibrous electromagnetic wave absorber inspired by spider silk hunting. *Small* 20(52):2407178. <https://doi.org/10.1002/smll.202407178>
22. Weng J, Liu Y, Huang X (2025) Synthesis of in situ grown CNTs on MOF-derived Ni@CNT with tailorable microstructures toward regulation of electromagnetic wave absorption performance. *Carbon* 231:119678. <https://doi.org/10.1016/j.carbon.2024.119678>
23. Hou Z, Zhang M, Kong L, Fang H, Li Z, Zhou H, Jin H, Cao M (2013) Microwave permittivity and permeability experiments in high-loss dielectrics: Caution with implicit Fabry-Pérot resonance for negative imaginary permeability. *Appl Phys Lett* 103(16):162905. <https://doi.org/10.1063/1.4825378>

24. Liu Y, Zhou J, Li C, Zhang H, Wang Y, Yan Y, Duan L, Cheng Z, Ma Y, Yao Z (2025) Interfacial coupling effects in two-dimensional ordered arrays for microwave attenuation. Nat Commun 16(1):202. <https://doi.org/10.1038/s41467-024-55776-9>
